# Supplementary material
Source: PubMed Central journal article supplement (PMC5247657)

**Supp Table 2: Common overexpressed genes in murine NOTCH transgenic and human CCRCC**

| Human gene | Gene description                                                                                   | probe ID    | log2 FC in RCC | p-value   | FDR        | Mouse gene         | log2 FC in Notch | p-value     | FDR         |
|------------|----------------------------------------------------------------------------------------------------|-------------|----------------|-----------|------------|--------------------|------------------|-------------|-------------|
| COL15A1    | collagen, type XV, alpha 1                                                                         | 203477_at   | 5.000652624    | 1.693E-11 | 7.68E-10   | Col15a1            | 1.295097247      | 0.000238858 | 0.030534649 |
| FN1        | fibronectin 1                                                                                      | 212464_s_at | 4.825120632    | 2.821E-10 | 2.85E-08   | Fn1                | 2.835162569      | 0.000595168 | 0.006140554 |
| COL1A2     | collagen, type I, alpha 2                                                                          | 202404_s_at | 4.82180718     | 4.044E-08 | 4.65E-07   | Col1a2             | 2.195114578      | 0.000238858 | 0.017864666 |
| FN1        | fibronectin 1                                                                                      | 211719_x_at | 4.664261632    | 5.133E-10 | 5.90E-08   | Fn1                | 2.835162569      | 0.000595168 | 0.006140554 |
| C1QB       | complement component 1, q subcomponent, B chain                                                    | 202953_at   | 4.387089222    | 4.42E-10  | 9.22E-09   | C1qb               | 2.472442452      | 0.000238858 | 0.019907267 |
| CP         | ceruloplasmin (ferroxidase)                                                                        | 204846_at   | 4.322032254    | 1.889E-08 | 1.33E-07   | Cp                 | 3.309604646      | 0.000238858 | 0.003556573 |
| FN1        | fibronectin 1                                                                                      | 216442_x_at | 4.28220822     | 8.165E-11 | 9.22E-09   | Fn1                | 2.835162569      | 0.000595168 | 0.006140554 |
| FN1        | fibronectin 1                                                                                      | 210495_x_at | 4.268778126    | 5.399E-11 | 5.44E-09   | Fn1                | 2.835162569      | 0.000595168 | 0.006140554 |
| CCL5       | chemokine (C-C motif) ligand 5                                                                     | 1405_i_at   | 4.235505386    | 5.501E-14 | 1.81E-11   | Ccl5               | 2.367581075      | 0.000238858 | 0.00637081  |
| TYROBP     | TYRO protein tyrosine kinase binding protein                                                       | 204122_at   | 4.157601392    | 8.569E-11 | 1.70E-09   | Tyrobp             | 1.600934915      | 0.007802665 | 0.018327416 |
| CCND1      | cyclin D1                                                                                          | 208711_s_at | 4.148579926    | 3.508E-10 | 7.53E-08   | Ccnd1              | 1.97381624       | 0.000238858 | 0.007039273 |
| CAV2       | caveolin 2                                                                                         | 203324_s_at | 4.120352689    | 9.213E-09 | 4.33E-07   | Cav2               | 1.617953154      | 0.000238858 | 0.03532672  |
| MCAM       | melanoma cell adhesion molecule                                                                    | 210869_s_at | 4.097509707    | 3.133E-11 | 1.04E-08   | Mcam               | 1.010818978      | 0.000595168 | 0.025456091 |
| THBS1      | thrombospondin 1                                                                                   | 201110_s_at | 3.997142365    | 5.132E-11 | 1.04E-08   | Thbs1              | 1.995839439      | 0.007802665 | 0.032140705 |
| C3         | complement component 3                                                                             | 217767_at   | 3.818778368    | 1.511E-08 | 4.05E-07   | C3                 | 4.039022828      | 0.000238858 | 0.006880923 |
| CAV2       | caveolin 2                                                                                         | 203323_at   | 3.816397368    | 3.151E-09 | 1.72E-07   | Cav2               | 1.617953154      | 0.000238858 | 0.03532672  |
| CRIP1      | cysteine-rich protein 1 (intestinal)                                                               | 205081_at   | 3.772932474    | 2.364E-09 | 2.85E-07   | Crip1              | 1.954465767      | 0.000238858 | 0.010470757 |
| COL5A2     | collagen, type V, alpha 2                                                                          | 221729_at   | 3.729277053    | 6.478E-10 | 2.01E-08   | Col5a2             | 1.208345729      | 0.000238858 | 0.016954554 |
| CCL5       | chemokine (C-C motif) ligand 5                                                                     | 204655_at   | 3.621662943    | 5.51E-09  | 2.04E-07   | Ccl5               | 2.367581075      | 0.000238858 | 0.00637081  |
| CYBB       | cytochrome b-245, beta polypeptide                                                                 | 203923_s_at | 3.610656142    | 1.533E-09 | 1.84E-08   | Cybb               | 2.312616918      | 0.000238858 | 0.033261836 |
| SPON1      | spondin 1, extracellular matrix protein                                                            | 213993_at   | 3.581141645    | 6.04E-06  | 0.00014109 | Spon1              | 2.248848929      | 0.007802665 | 0.010875679 |
| CLU        | clusterin                                                                                          | 208791_at   | 3.534226029    | 7.134E-08 | 2.61E-06   | Clu                | 2.791853406      | 0.000238858 | 0.007042248 |
| MYC        | v-myc myelocytomatosis viral oncogene homolog (avian)                                              | 202431_s_at | 3.454276575    | 1.282E-07 | 3.60E-06   | Myc                | 2.198047983      | 0.007780321 | 0.005402386 |
| LAPTM5     | lysosomal protein transmembrane 5                                                                  | 201721_s_at | 3.434628734    | 1.883E-07 | 2.22E-06   | Laptm5             | 1.92760323       | 0.000595168 | 0.018965837 |
| SPON1      | spondin 1, extracellular matrix protein                                                            | 213994_s_at | 3.431147008    | 2.828E-05 | 0.00040396 | Spon1              | 2.248848929      | 0.007802665 | 0.010875679 |
| C1QA       | complement component 1, q subcomponent, A chain                                                    | 218232_at   | 3.416009117    | 2.1E-09   | 2.66E-08   | C1qa               | 2.208085715      | 0.000238858 | 0.030614858 |
| TGFBI      | transforming growth factor, beta-induced, 68kDa                                                    | 201506_at   | 3.413421983    | 3.47E-06  | 1.1616E-05 | Tgfbi              | 1.588868426      | 0.007802665 | 0.009071591 |
| PDGFD      | platelet derived growth factor D                                                                   | 219304_s_at | 3.400954898    | 1.763E-06 | 2.5148E-05 | Pdgfd              | 1.203275945      | 0.007780321 | 0.008341677 |
| SPON1      | spondin 1, extracellular matrix protein                                                            | 209436_at   | 3.377981155    | 8.076E-07 | 4.5729E-05 | Spon1              | 2.248848929      | 0.007802665 | 0.010875679 |
| CXCL10     | chemokine (C-X-C motif) ligand 10                                                                  | 204533_at   | 3.377040392    | 5.939E-07 | 6.28E-06   | Cxcl10             | 2.548156009      | 0.000238858 | 0.013293742 |
| CD44       | CD44 molecule (Indian blood group)                                                                 | 212063_at   | 3.359640314    | 9.88E-07  | 7.95E-06   | Cd44               | 3.669944538      | 0.000238858 | 0.009318602 |
| CLU        | clusterin                                                                                          | 208792_s_at | 3.329168397    | 1.082E-07 | 3.59E-06   | Clu                | 2.791853406      | 0.000238858 | 0.007042248 |
| EGFR       | epidermal growth factor receptor (erythroblastic leukemia viral (v-erb-b) oncogene homolog, avian) | 201983_s_at | 3.27778592     | 1.258E-06 | 4.64E-06   | Egfr<br>8430408G22 | 1.12838893       | 0.000595168 | 0.008781244 |
| C10orf10   | chromosome 10 open reading frame 10                                                                | 209183_s_at | 3.268481917    | 6.405E-08 | 1.72E-06   | Rik                | 3.909310722      | 0.000222151 | 0.007872015 |
| CTSS       | cathepsin S                                                                                        | 202902_s_at | 3.259363722    | 1.37E-07  | 1.20E-06   | Ctss               | 3.793291333      | 0.000238858 | 0.0129416   |
| MCAM       | melanoma cell adhesion molecule                                                                    | 211340_s_at | 3.252408211    | 1.243E-12 | 5.50E-10   | Mcam               | 1.010818978      | 0.000595168 | 0.025456091 |

|          |                                                                 |             |             |           |            |         |             |             |             |
|----------|-----------------------------------------------------------------|-------------|-------------|-----------|------------|---------|-------------|-------------|-------------|
| CDH11    | cadherin 11, type 2, OB-cadherin (osteoblast)                   | 207173_x_at | 3.241940076 | 9.643E-06 | 2.9636E-05 | Cdh11   | 1.035002709 | 0.000238858 | 0.01242406  |
| B2M      | beta-2-microglobulin                                            | 216231_s_at | 3.234848719 | 1.54E-05  | 9.6923E-05 | B2m     | 1.513124621 | 8.09679E-05 | 0.005852617 |
| ABCA1    | ATP-binding cassette, sub-family A (ABC1), member 1             | 203504_s_at | 3.210636089 | 1.176E-08 | 5.83E-07   | Abca1   | 1.538189814 | 1.87131E-05 | 0.027369132 |
| VIM      | vimentin                                                        | 201426_s_at | 3.201498627 | 0.0001318 | 0.00052438 | Vim     | 2.000414811 | 0.000668853 | 0.012393041 |
| TIMP1    | TIMP metalloproteinase inhibitor 1                              | 201666_at   | 3.179056955 | 5.553E-06 | 3.827E-05  | Timp1   | 3.076359101 | 0.007802665 | 0.015617921 |
| SOX4     | SRY (sex determining region Y)-box 4                            | 201417_at   | 3.149703251 | 2.366E-05 | 0.00013449 | Sox4    | 1.83457195  | 0.007802665 | 0.017359487 |
| ACTN1    | actinin, alpha 1                                                | 208637_x_at | 3.132947136 | 2.836E-12 | 6.36E-10   | Actn1   | 2.871528808 | 1.87131E-05 | 0.003999209 |
| COL3A1   | collagen, type III, alpha 1                                     | 201852_x_at | 3.117869383 | 3.541E-05 | 7.8299E-05 | Col3a1  | 2.00737099  | 0.000238858 | 0.015592674 |
| OXR1     | oxidation resistance 1                                          | 218197_s_at | 3.114256742 | 5.766E-10 | 5.82E-08   | Oxr1    | 1.357309727 | 0.007780321 | 0.009134356 |
| COL4A1   | collagen, type IV, alpha 1                                      | 211980_at   | 3.106374307 | 1.483E-06 | 2.0022E-05 | Col4a1  | 2.206103733 | 0.000238858 | 0.004387246 |
| ARL4C    | ADP-ribosylation factor-like 4C                                 | 202207_at   | 3.09148865  | 1.753E-06 | 9.47E-06   | Arl4c   | 1.551419902 | 8.09679E-05 | 0.00943343  |
| MYBL1    | v-myb myeloblastosis viral oncogene homolog (avian)-like 1      | 213906_at   | 3.038814267 | 8.952E-09 | 3.85E-07   | Mybl1   | 1.439934601 | 0.007780321 | 0.010153799 |
| GJA1     | gap junction protein, alpha 1, 43kDa                            | 201667_at   | 3.011981952 | 8.411E-05 | 0.00046796 | Gja1    | 1.297323779 | 0.000595168 | 0.049155858 |
| IFNGR1   | interferon gamma receptor 1                                     | 211676_s_at | 2.927981766 | 5.223E-08 | 1.12E-06   | Ifngr1  | 1.325812942 | 0.000595168 | 0.021487268 |
| FBN1     | fibrillin 1                                                     | 202766_s_at | 2.91958836  | 4.306E-10 | 1.06E-08   | Fbn1    | 2.125238148 | 0.000595168 | 0.016588881 |
| CXCR4    | chemokine (C-X-C motif) receptor 4                              | 217028_at   | 2.911158937 | 1.269E-06 | 1.7282E-05 | Cxcr4   | 1.506493412 | 0.000238858 | 0.026942723 |
| KLF6     | Kruppel-like factor 6                                           | 208961_s_at | 2.904917109 | 2.18E-09  | 7.98E-08   | Klf6    | 2.010594128 | 0.000795125 | 0.013390761 |
| FYB      | FYN binding protein                                             | 211795_s_at | 2.902683026 | 8.271E-07 | 3.55E-06   | Fyb     | 1.33626225  | 0.000595168 | 0.027415237 |
| BTG1     | B-cell translocation gene 1, anti-proliferative                 | 200920_s_at | 2.90029543  | 3.28E-07  | 7.15E-06   | Btg1    | 1.577955223 | 0.000238858 | 0.009650769 |
| COL5A2   | collagen, type V, alpha 2                                       | 221730_at   | 2.888469576 | 1.077E-09 | 2.40E-08   | Col5a2  | 1.208345729 | 0.000238858 | 0.016954554 |
| HK2      | hexokinase 2                                                    | 202934_at   | 2.847544128 | 2.311E-05 | 0.00012902 | Hk2     | 1.019432649 | 0.000595168 | 0.01348144  |
| ABCC1    | ATP-binding cassette, sub-family C (CFTR/MRP), member 1         | 202803_s_at | 2.808268604 | 3.22E-07  | 1.46E-06   | Abcc1   | 1.11990213  | 1.87131E-05 | 0.007479413 |
| CTSS     | cathepsin S                                                     | 202901_x_at | 2.782724425 | 4.074E-07 | 4.83E-06   | Ctss    | 3.793291333 | 0.000238858 | 0.0129416   |
| RPS9     | ribosomal protein S9                                            | 217747_s_at | 2.78112297  | 9.344E-06 | 7.2045E-05 | Rps9    | 1.328465044 | 0.007780321 | 0.010379216 |
| CD14     | CD14 molecule                                                   | 201743_at   | 2.777083446 | 2.585E-06 | 9.85E-06   | Cd14    | 2.790425369 | 0.000238858 | 0.010107001 |
| COL3A1   | collagen, type III, alpha 1                                     | 211161_s_at | 2.774091857 | 0.0003496 | 0.00064815 | Col3a1  | 2.00737099  | 0.000238858 | 0.015592674 |
| MCAM     | melanoma cell adhesion molecule                                 | 209087_x_at | 2.773724314 | 2.308E-10 | 2.55E-08   | Mcam    | 1.010818978 | 0.000595168 | 0.025456091 |
| WSB1     | WD repeat and SOCS box-containing 1                             | 201294_s_at | 2.756555366 | 6.308E-06 | 1.6882E-05 | Wsb1    | 2.189149968 | 0.007802665 | 0.007034113 |
| MAP4K4   | mitogen-activated protein kinase kinase kinase 4                | 218181_s_at | 2.750765656 | 3.671E-07 | 7.05E-06   | Map4k4  | 1.067960292 | 0.000595168 | 0.011392538 |
| EGR1     | early growth response 1                                         | 201693_s_at | 2.744059214 | 5.021E-05 | 0.00052381 | Egr1    | 2.012801731 | 0.000595168 | 0.017712967 |
| MS4A6A   | member 6A                                                       | 219666_at   | 2.73429494  | 9.482E-07 | 7.94E-06   | Ms4a6d  | 1.548319794 | 0.000595168 | 0.043533476 |
| ZFP36L1  | zinc finger protein 36, C3H type-like 1                         | 211965_at   | 2.724758076 | 2.171E-10 | 1.13E-07   | Zfp36l1 | 1.105105295 | 0.007802665 | 0.041414048 |
| AGT      | angiotensinogen (serpin peptidase inhibitor, clade A, member 8) | 202833_s_at | 2.688249004 | 0.0001626 | 0.00042236 | Agt     | 1.91966238  | 8.09679E-05 | 0.006339117 |
| HLA-DQB1 | major histocompatibility complex, class II, DQ beta 1           | 211654_x_at | 2.673467638 | 9.148E-07 | 4.75E-06   | H2-Ab1  | 1.866453025 | 0.000595168 | 0.036869055 |
| STC2     | stanniocalcin 2                                                 | 203438_at   | 2.639940618 | 3.336E-06 | 1.5687E-05 | Stc2    | 1.20740991  | 0.007802665 | 0.009867959 |
| RPL35    | ribosomal protein L35                                           | 200002_at   | 2.622577367 | 8.044E-08 | 2.53E-06   | Rpl35   | 1.351611183 | 0.007780321 | 0.022172818 |
| PFKP     | phosphofructokinase, platelet                                   | 201037_at   | 2.615829841 | 9.892E-09 | 2.11E-07   | Pfcp    | 1.365978016 | 0.000346901 | 0.009318602 |
| WSB1     | WD repeat and SOCS box-containing 1                             | 210561_s_at | 2.603355516 | 1.156E-09 | 9.65E-08   | Wsb1    | 2.189149968 | 0.007802665 | 0.007034113 |
| PDLIM5   | PDZ and LIM domain 5                                            | 213684_s_at | 2.584921257 | 9.57E-12  | 5.50E-10   | Pdlim5  | 1.251449731 | 0.007780321 | 0.009904028 |
| SCARB1   | scavenger receptor class B, member 1                            | 201819_at   | 2.572344993 | 4.761E-10 | 2.04E-08   | Scarb1  | 1.194149153 | 0.007780321 | 0.012850495 |
| RPL23    | ribosomal protein L23                                           | 200888_s_at | 2.560567806 | 5.889E-07 | 9.85E-06   | Rpl23   | 1.168389111 | 0.007780321 | 0.00432153  |
| COL1A1   | collagen, type I, alpha 1                                       | 202310_s_at | 2.530033878 | 2.413E-05 | 5.2311E-05 | Col1a1  | 2.960442829 | 0.000238858 | 0.006480739 |

|          |                                                                                               |             |             |           |            |         |             |             |             |
|----------|-----------------------------------------------------------------------------------------------|-------------|-------------|-----------|------------|---------|-------------|-------------|-------------|
| COL3A1   | collagen, type III, alpha 1                                                                   | 215076_s_at | 2.494150125 | 0.0001229 | 0.00025023 | Col3a1  | 2.00737099  | 0.000238858 | 0.015592674 |
| BTG1     | B-cell translocation gene 1, anti-proliferative LIM domain containing preferred translocation | 200921_s_at | 2.486434203 | 2.634E-06 | 2.9694E-05 | Btg1    | 1.577955223 | 0.000238858 | 0.009650769 |
| LPP      | partner in lipoma                                                                             | 202820_at   | 2.484091405 | 4.505E-10 | 4.07E-08   | Lpp     | 1.016570491 | 0.000595168 | 0.008764431 |
| EDN1     | endothelin 1                                                                                  | 218995_s_at | 2.445878574 | 1.939E-07 | 9.43E-07   | Edn1    | 3.033092773 | 0.000595168 | 0.00458804  |
| GNB2L1   | guanine nucleotide binding protein (G protein), beta polypeptide 2-like 1                     | 200651_at   | 2.442812443 | 1.212E-05 | 8.4832E-05 | Gnb2l1  | 1.332454493 | 0.000595168 | 0.004875977 |
| SMC4     | structural maintenance of chromosomes 4                                                       | 201664_at   | 2.437627579 | 4.323E-08 | 9.43E-07   | Smc4    | 1.493921227 | 0.007802665 | 0.007158253 |
| BCL2A1   | BCL2-related protein A1                                                                       | 205681_at   | 2.411909977 | 0.0006506 | 0.0007342  | Bcl2a1a | 1.356207843 | 8.09679E-05 | 0.029527584 |
| LMNB1    | lamin B1                                                                                      | 203276_at   | 2.409745742 | 1.055E-12 | 2.47E-10   | Lmnb1   | 2.180250799 | 0.000595168 | 0.004307812 |
| DKK3     | dickkopf homolog 3 (Xenopus laevis)                                                           | 202196_s_at | 2.370941143 | 1.068E-06 | 5.41E-06   | Dkk3    | 2.111260683 | 0.000595168 | 0.003999209 |
| CD74     | CD74 molecule, major histocompatibility complex, class II invariant chain                     | 209619_at   | 2.370421175 | 4.697E-09 | 1.77E-07   | Cd74    | 1.793366523 | 0.000238858 | 0.025171371 |
| ANO1     | anoctamin 1, calcium activated chloride channel                                               | 218804_at   | 2.34235409  | 7.421E-06 | 3.4553E-05 | Ano1    | 3.917996603 | 8.09679E-05 | 0.005372745 |
| PYGL     | phosphorylase, glycogen, liver                                                                | 202990_at   | 2.324199795 | 4.602E-12 | 7.63E-09   | Pygl    | 2.629700388 | 0.007780321 | 0.004691099 |
| DTL      | denticleless homolog (Drosophila)                                                             | 218585_s_at | 2.319085996 | 1.431E-07 | 9.41E-07   | Dtl     | 2.495818393 | 0.000595168 | 0.007042248 |
| RPL13A   | ribosomal protein L13a                                                                        | 200716_x_at | 2.319032035 | 3.451E-06 | 3.3984E-05 | Rpl13a  | 1.136151209 | 0.007780321 | 0.004265377 |
| FNDC3B   | fibronectin type III domain containing 3B                                                     | 218618_s_at | 2.310946097 | 4.248E-05 | 0.00016742 | Fndc3b  | 1.010327766 | 0.000595168 | 0.018325711 |
| ICAM1    | intercellular adhesion molecule 1                                                             | 202638_s_at | 2.309531449 | 2.708E-08 | 5.33E-07   | Icam1   | 1.71965319  | 0.000595168 | 0.015634585 |
| HEY2     | hairy/enhancer-of-split related with YRPW motif 2                                             | 219743_at   | 2.308869962 | 2.468E-07 | 1.2634E-05 | Hey2    | 2.199287672 | 0.000595168 | 0.01835502  |
| PSMB9    | proteasome (prosome, macropain) subunit, beta type, 9 (large multifunctional peptidase 2)     | 204279_at   | 2.308215277 | 4.259E-06 | 2.6548E-05 | Psmb9   | 1.408598524 | 0.007780321 | 0.012537768 |
| LOXL2    | lysyl oxidase-like 2                                                                          | 202998_s_at | 2.28424097  | 1.429E-08 | 1.74E-07   | Loxl2   | 1.133330055 | 0.000595168 | 0.044252483 |
| ACTN1    | actinin, alpha 1                                                                              | 211160_x_at | 2.247378399 | 2.401E-09 | 1.43E-07   | Actn1   | 2.871528808 | 1.87131E-05 | 0.003999209 |
| ABCG1    | ATP-binding cassette, sub-family G (WHITE), member 1                                          | 204567_s_at | 2.247071558 | 5.512E-06 | 4.5729E-05 | Abcg1   | 1.405458535 | 1.87131E-05 | 0.024580552 |
| HLA-DQB1 | major histocompatibility complex, class II, DQ beta 1                                         | 209823_x_at | 2.242510356 | 1.664E-05 | 0.00003914 | H2-Ab1  | 1.866453025 | 0.000595168 | 0.036869055 |
| MCAM     | melanoma cell adhesion molecule                                                               | 209086_x_at | 2.239886789 | 2.694E-08 | 1.30E-06   | Mcam    | 1.010818978 | 0.000595168 | 0.025456091 |
| RHOB     | ras homolog gene family, member B                                                             | 212099_at   | 2.226380935 | 1.378E-07 | 1.0328E-05 | Rhob    | 1.286505256 | 0.007780321 | 0.031862082 |
| CXCR4    | chemokine (C-X-C motif) receptor 4                                                            | 209201_x_at | 2.222109132 | 1.788E-07 | 1.46E-06   | Cxcr4   | 1.506493412 | 0.000238858 | 0.026942723 |
| NID2     | nidogen 2 (osteonidogen)                                                                      | 204114_at   | 2.220223181 | 4.047E-07 | 5.30E-06   | Nid2    | 1.403163864 | 0.007780321 | 0.008906826 |
| COL1A2   | collagen, type I, alpha 2                                                                     | 202403_s_at | 2.206268062 | 3.761E-05 | 7.1916E-05 | Col1a2  | 2.195114578 | 0.000238858 | 0.017864666 |
| CSF2RB   | colony stimulating factor 2 receptor, beta, low-affinity (granulocyte-macrophage)             | 205159_at   | 2.189284602 | 0.0001388 | 0.00035648 | Csf2rb  | 1.340660761 | 0.000238858 | 0.03178681  |
| CCND1    | cyclin D1                                                                                     | 208712_at   | 2.149884449 | 6.263E-06 | 0.00010138 | Ccnd1   | 1.97381624  | 0.000238858 | 0.007039273 |
| S100A6   | S100 calcium binding protein A6                                                               | 217728_at   | 2.137093224 | 1.243E-05 | 8.7336E-05 | S100a6  | 2.264511332 | 0.007780321 | 0.023594021 |
| CDH6     | cadherin 6, type 2, K-cadherin (fetal kidney)                                                 | 205532_s_at | 2.128458704 | 0.0001929 | 0.00174905 | Cdh6    | 4.275730765 | 0.000238858 | 0.005826814 |
| RAD50    | RAD50 homolog (S. cerevisiae)                                                                 | 209349_at   | 2.124101912 | 6.412E-13 | 2.57E-10   | Rad50   | 1.004085148 | 0.007780321 | 0.02421305  |
| SATB2    | SATB homeobox 2                                                                               | 213435_at   | 2.120222784 | 5.742E-05 | 0.00030648 | Satb2   | 1.431422921 | 0.007780321 | 0.008579994 |
| RPL27A   | ribosomal protein L27a                                                                        | 203034_s_at | 2.117767839 | 1.324E-06 | 1.6706E-05 | Rpl27a  | 1.01611217  | 0.007780321 | 0.005826814 |
| LY86     | lymphocyte antigen 86                                                                         | 205859_at   | 2.098846844 | 4.475E-05 | 8.6284E-05 | Ly86    | 1.626195412 | 0.000595168 | 0.040447904 |
| MCL1     | myeloid cell leukemia sequence 1 (BCL2-related)                                               | 200798_x_at | 2.090824781 | 0.0001294 | 0.00038593 | Mcl1    | 2.037082683 | 0.000595168 | 0.003999209 |
| BIRC3    | baculoviral IAP repeat-containing 3                                                           | 210538_s_at | 2.089562473 | 4.709E-07 | 4.72E-06   | Birc3   | 1.421647031 | 8.09679E-05 | 0.017712108 |
| KRT8     | keratin 8                                                                                     | 209008_x_at | 2.080324724 | 4.397E-06 | 3.0263E-05 | Krt8    | 1.622797013 | 0.000595168 | 0.011192816 |
| TAGLN2   | transgelin 2                                                                                  | 200916_at   | 2.074770825 | 1.197E-06 | 1.0019E-05 | Tagln2  | 1.202240994 | 0.007802665 | 0.008184445 |
| TOP2A    | topoisomerase (DNA) II alpha 170kDa                                                           | 201291_s_at | 2.070604728 | 1.007E-09 | 3.76E-07   | Top2a   | 3.411732079 | 0.007802665 | 0.007592155 |
| SOX4     | SRY (sex determining region Y)-box 4                                                          | 213668_s_at | 2.064155463 | 3.35E-08  | 4.86E-07   | Sox4    | 1.83457195  | 0.007802665 | 0.017359487 |

|          |                                                                                                    |             |             |           |            |          |             |             |             |
|----------|----------------------------------------------------------------------------------------------------|-------------|-------------|-----------|------------|----------|-------------|-------------|-------------|
| EGFR     | epidermal growth factor receptor (erythroblastic leukemia viral (v-erb-b) oncogene homolog, avian) | 201984_s_at | 2.060312784 | 0.0015165 | 0.00171274 | Egfr     | 1.12838893  | 0.000595168 | 0.008781244 |
| RPS5     | ribosomal protein S5                                                                               | 200024_at   | 2.05953241  | 1.883E-05 | 0.00011119 | Rps5     | 1.21201828  | 0.007780321 | 0.017460884 |
| MARCKSL1 | MARCKS-like 1                                                                                      | 200644_at   | 2.05434351  | 2.67E-07  | 6.52E-06   | Marcksl1 | 2.27354531  | 0.000595168 | 0.02899108  |
| PDLIM5   | PDZ and LIM domain 5                                                                               | 203243_s_at | 2.040400777 | 0.0003278 | 0.00109988 | Pdlim5   | 1.251449731 | 0.007780321 | 0.009904028 |
| PLAC8    | placenta-specific 8                                                                                | 219014_at   | 2.035154282 | 1.194E-05 | 4.8072E-05 | Plac8    | 1.496202485 | 0.007780321 | 0.04992709  |
| TUBB     | tubulin, beta                                                                                      | 211714_x_at | 2.034728555 | 3.237E-06 | 2.9501E-05 | Tubb5    | 2.551802106 | 0.007802665 | 0.005044732 |
| PLA2G7   | phospholipase A2, group VII (platelet-activating factor acetylhydrolase, plasma)                   | 206214_at   | 2.028807925 | 0.0030192 | 0.00381753 | Pla2g7   | 2.055526749 | 0.007780321 | 0.039018347 |
| NUSAP1   | nucleolar and spindle associated protein 1                                                         | 219978_s_at | 2.025478577 | 4.547E-08 | 6.00E-07   | Nusap1   | 1.275009801 | 0.007780321 | 0.019031802 |
| TUBB     | tubulin, beta                                                                                      | 209026_x_at | 2.024132216 | 1.035E-05 | 6.5028E-05 | Tubb5    | 2.551802106 | 0.007802665 | 0.005044732 |
| JAG1     | jagged 1 (Alagille syndrome)                                                                       | 209099_x_at | 2.016652673 | 1.534E-08 | 4.69E-07   | Jag1     | 4.045475992 | 0.000595168 | 0.003719205 |
| ARHGAP26 | Rho GTPase activating protein 26                                                                   | 205068_s_at | 1.996775744 | 1.181E-08 | 2.00E-07   | Arhgap26 | 1.12340306  | 8.09679E-05 | 0.010573718 |
| C5AR1    | complement component 5a receptor 1                                                                 | 220088_at   | 1.996196772 | 9.557E-05 | 0.00019129 | C5ar1    | 1.3604748   | 0.000238858 | 0.009134356 |
| DKK3     | dickkopf homolog 3 (Xenopus laevis)                                                                | 214247_s_at | 1.984561951 | 7.395E-06 | 3.8982E-05 | Dkk3     | 2.111260683 | 0.000595168 | 0.003999209 |
| TCIRG1   | T-cell, immune regulator 1, ATPase, H+ transporting, lysosomal V0 subunit A3                       | 204158_s_at | 1.977406997 | 8.262E-06 | 4.2638E-05 | Tcirg1   | 1.048159692 | 0.007802665 | 0.005918478 |
| HES1     | hairly and enhancer of split 1, (Drosophila)                                                       | 203394_s_at | 1.975383156 | 2.415E-05 | 0.00011687 | Hes1     | 1.72786431  | 0.000595168 | 0.003999209 |
| WSB1     | WD repeat and SOCS box-containing 1                                                                | 201296_s_at | 1.966045205 | 7.66E-06  | 5.3816E-05 | Wsb1     | 2.189149968 | 0.007802665 | 0.007034113 |
| CXCR4    | chemokine (C-X-C motif) receptor 4                                                                 | 211919_s_at | 1.956334917 | 1.557E-08 | 6.43E-07   | Cxcr4    | 1.506493412 | 0.000238858 | 0.026942723 |
| NOTCH3   | Notch homolog 3 (Drosophila)                                                                       | 203238_s_at | 1.951818848 | 1.338E-06 | 1.198E-05  | Notch3   | 2.249206997 | 0.007780321 | 0.004015297 |
| JAG1     | jagged 1 (Alagille syndrome)                                                                       | 216268_s_at | 1.938115936 | 5.222E-07 | 7.12E-06   | Jag1     | 4.045475992 | 0.000595168 | 0.003719205 |
| ALOX5AP  | arachidonate 5-lipoxygenase-activating protein                                                     | 204174_at   | 1.925877878 | 3.87E-05  | 8.255E-05  | Alox5ap  | 1.018175053 | 8.09679E-05 | 0.024951145 |
| IFNGR1   | interferon gamma receptor 1                                                                        | 202727_s_at | 1.917305916 | 2.372E-05 | 0.00012244 | Ifngr1   | 1.325812942 | 0.000595168 | 0.021487268 |
| TBC1D4   | TBC1 domain family, member 4                                                                       | 203387_s_at | 1.904783087 | 1.093E-05 | 6.2869E-05 | Tbc1d4   | 1.284378057 | 0.007802665 | 0.012061791 |
| ARPC1B   | actin related protein 2/3 complex, subunit 1B, 41kDa                                               | 201954_at   | 1.894481022 | 8.156E-07 | 5.60E-06   | Arpc1b   | 1.932045185 | 8.09679E-05 | 0.008995114 |
| LAPTM5   | lysosomal protein transmembrane 5                                                                  | 201720_s_at | 1.891232328 | 1.725E-05 | 3.8833E-05 | Laptm5   | 1.92760323  | 0.000595168 | 0.018965837 |
| KIAA0101 | KIAA0101                                                                                           | 202503_s_at | 1.890961469 | 1.376E-05 | 5.9338E-05 | Rik      | 2.483974974 | #N/A        | 0.015709677 |
| FYB      | FYN binding protein                                                                                | 211794_at   | 1.886895655 | 4.204E-05 | 7.4074E-05 | Fyb      | 1.33626225  | 0.000595168 | 0.027415237 |
| SYNE2    | spectrin repeat containing, nuclear envelope 2                                                     | 202761_s_at | 1.886452335 | 0.0002838 | 0.00150338 | Syne2    | 1.207645711 | 0.007802665 | 0.005372745 |
| TUBA1B   | tubulin, alpha 1b                                                                                  | 212639_x_at | 1.85998884  | 8.812E-05 | 0.00031583 | Tuba1b   | 1.726518982 | 0.007802665 | 0.006937559 |
| ASNS     | asparagine synthetase (glutamine-hydrolyzing)                                                      | 205047_s_at | 1.859747354 | 4.926E-05 | 0.0001654  | Asns     | 2.299099818 | 8.09679E-05 | 0.0058055   |
| SOX9     | SRY (sex determining region Y)-box 9                                                               | 202935_s_at | 1.85947195  | 0.00024   | 0.00086929 | Sox9     | 2.035893638 | 0.007802665 | 0.01002091  |
| KLF6     | Kruppel-like factor 6                                                                              | 208960_s_at | 1.84590098  | 4.809E-05 | 0.00015683 | Klf6     | 2.010594128 | 0.000795125 | 0.013390761 |
| NPM1     | nucleophosmin (nucleolar phosphoprotein B23, numatrin)                                             | 221691_x_at | 1.834164168 | 7.359E-05 | 0.00030593 | Npm1     | 1.133935389 | 0.007780321 | 0.003999209 |
| CD44     | CD44 molecule (Indian blood group)                                                                 | 204489_s_at | 1.824887287 | 5.611E-05 | 0.00010539 | Cd44     | 3.669944538 | 0.000238858 | 0.009318602 |
| SNX10    | sorting nexin 10                                                                                   | 218404_at   | 1.824630473 | 0.0001581 | 0.00046878 | Snx10    | 1.301362824 | 0.007802665 | 0.026499151 |
| SLC38A2  | solute carrier family 38, member 2                                                                 | 218041_x_at | 1.817516376 | 0.0004523 | 0.00132791 | Slc38a2  | 1.597011691 | 0.007802665 | 0.018368113 |
| CDH6     | cadherin 6, type 2, K-cadherin (fetal kidney)                                                      | 205533_s_at | 1.815467441 | 0.0003755 | 0.00369959 | Cdh6     | 4.275730765 | 0.000238858 | 0.005826814 |
| NCKAP1L  | NCK-associated protein 1-like                                                                      | 209734_at   | 1.813114638 | 1.972E-05 | 3.9232E-05 | Nckap1l  | 1.568737457 | 0.007780321 | 0.031597152 |
| IRF1     | interferon regulatory factor 1                                                                     | 202531_at   | 1.810808785 | 2.561E-07 | 3.36E-06   | Irf1     | 1.235392762 | 0.000595168 | 0.009375598 |
| TUBB     | tubulin, beta                                                                                      | 212320_at   | 1.799655978 | 9.232E-05 | 0.00030757 | Tubb5    | 2.551802106 | 0.007802665 | 0.005044732 |
| ARL4C    | ADP-ribosylation factor-like 4C                                                                    | 202206_at   | 1.797567539 | 0.0001037 | 0.00017407 | Arl4c    | 1.551419902 | 8.09679E-05 | 0.009433343 |
| CARHSP1  | calcium regulated heat stable protein 1, 24kDa                                                     | 218384_at   | 1.79618676  | 3.533E-07 | 5.50E-06   | Carhsp1  | 1.363707526 | 0.000238858 | 0.00979781  |
| COL4A2   | collagen, type IV, alpha 2                                                                         | 211964_at   | 1.779540347 | 1.724E-06 | 2.5009E-05 | Col4a2   | 1.937089185 | 0.000238858 | 0.005826814 |

| Gene     | Description                                          | Accession   | Score       | E-value   | Score      | Score      | E-value     | E-value     |             |
|----------|------------------------------------------------------|-------------|-------------|-----------|------------|------------|-------------|-------------|-------------|
|          | Inhibitor of DNA binding 4, dominant negative helix- |             |             |           |            |            |             |             |             |
| ID4      | loop-helix protein                                   | 209292_at   | 1.764182386 | 0.0020634 | 0.00816792 | ld4        | 1.592377012 | 0.000595168 | 0.008245759 |
| THBS1    | thrombospondin 1                                     | 201109_s_at | 1.755447818 | 4.651E-05 | 0.00031353 | Thbs1      | 1.995839439 | 0.007802665 | 0.032140705 |
| DSG2     | desmoglein 2                                         | 217901_at   | 1.752748962 | 9.63E-05  | 0.00029187 | Dsg2       | 2.497053858 | 0.000595168 | 0.00637081  |
| PSIP1    | PC4 and SFRS1 interacting protein 1                  | 205961_s_at | 1.73171616  | 0.0003071 | 0.00109473 | Psip1      | 1.011342505 | 0.007780321 | 0.019860658 |
| IRF9     | interferon regulatory factor 9                       | 203882_at   | 1.729597809 | 1.127E-06 | 1.1075E-05 | Irf9       | 1.450561926 | 0.000595168 | 0.035621098 |
| C3AR1    | complement component 3a receptor 1                   | 209906_at   | 1.715753921 | 0.0003877 | 0.00049129 | C3ar1      | 2.413801421 | 0.000238858 | 0.014637729 |
| ANKRD6   | ankyrin repeat domain 6                              | 204672_s_at | 1.714495348 | 3.188E-05 | 0.00019139 | Ankrd6     | 1.928069067 | 8.09679E-05 | 0.005931314 |
| COL4A1   | collagen, type IV, alpha 1                           | 211981_at   | 1.71434175  | 1.465E-05 | 8.9989E-05 | Col4a1     | 2.206103733 | 0.000238858 | 0.004387246 |
| RCN1     | reticulocalbin 1, EF-hand calcium binding domain     | 201063_at   | 1.705763894 | 8.318E-05 | 0.00023247 | Rcn1       | 2.024085412 | 0.007780321 | 0.013791252 |
| DKK3     | dickkopf homolog 3 (Xenopus laevis)                  | 221127_s_at | 1.696495569 | 1.355E-07 | 1.27E-06   | Dkk3       | 2.111260683 | 0.000595168 | 0.003999209 |
| FXD5     | FXD domain containing ion transport regulator 5      | 218084_x_at | 1.695971252 | 3.34E-06  | 1.0012E-05 | Fxd5       | 1.559344036 | 0.000595168 | 0.019907267 |
| TOP2A    | topoisomerase (DNA) II alpha 170kDa                  | 201292_at   | 1.693954254 | 3.28E-09  | 1.1852E-05 | Top2a      | 3.411732079 | 0.007802665 | 0.007592155 |
| ECT2     | epithelial cell transforming sequence 2 oncogene     | 219787_s_at | 1.690474879 | 0.0004627 | 0.00082159 | Ect2       | 2.031276143 | 0.000595168 | 0.008995114 |
| CD9      | CD9 molecule                                         | 210005_at   | 1.690052379 | 0.0021524 | 0.0060967  | Cd9        | 1.544271675 | 0.000238858 | 0.02154686  |
| RPS14    | ribosomal protein S14                                | 208645_s_at | 1.689592492 | 4.799E-05 | 0.00023846 | Rps14      | 1.211808024 | 0.007780321 | 0.004580456 |
| PARP8    | poly (ADP-ribose) polymerase family, member 8        | 219033_at   | 1.686584148 | 2.29E-08  | 8.67E-07   | Parp8      | 1.107911835 | 0.007780321 | 0.01500852  |
| IER5     | immediate early response 5                           | 218611_at   | 1.686123718 | 5.082E-06 | 3.9158E-05 | Ier5       | 1.914861899 | 0.000595168 | 0.003999209 |
| CAPG     | capping protein (actin filament), gelsolin-like      | 201850_at   | 1.681017491 | 0.0003291 | 0.00054369 | Capg       | 2.224465098 | 0.000238858 | 0.00772325  |
| SLC38A2  | solute carrier family 38, member 2                   | 220924_s_at | 1.6804922   | 0.0003033 | 0.00095555 | Slc38a2    | 1.597011691 | 0.007802665 | 0.018368113 |
| FSTL1    | folliculin-like 1                                    | 208782_at   | 1.663490714 | 0.0005314 | 0.00111041 | Fstl1      | 2.321742248 | 0.000595168 | 0.030229298 |
| TUBA1B   | tubulin, alpha 1b                                    | 201090_x_at | 1.661672136 | 6.334E-05 | 0.00023148 | Tuba1b     | 1.726518982 | 0.007802665 | 0.006937559 |
| TUBA1B   | tubulin, alpha 1b                                    | 213646_x_at | 1.659521855 | 3.427E-05 | 0.00014639 | Tuba1b     | 1.726518982 | 0.007802665 | 0.006937559 |
| MSN      | moesin                                               | 200600_at   | 1.659233614 | 5.897E-06 | 5.647E-05  | Msn        | 1.23151465  | 0.000775725 | 0.007761234 |
| TES      | testis derived transcript (3 LIM domains)            | 202720_at   | 1.644142015 | 2.911E-06 | 2.3253E-05 | Tes        | 1.45483277  | 0.007802665 | 0.008380722 |
| JAG1     | jagged 1 (Alagille syndrome)                         | 209098_s_at | 1.640870854 | 3.21E-06  | 4.3974E-05 | Jag1       | 4.045475992 | 0.000595168 | 0.003719205 |
|          | microtubule associated monooxygenase, calponin and   |             |             |           |            |            |             |             |             |
| MICAL3   | LIM domain containing 3                              | 212715_s_at | 1.636589979 | 2.577E-05 | 0.00034748 | Mical3     | 1.02262311  | 0.000595168 | 0.005087009 |
| RPL13A   | ribosomal protein L13a                               | 212790_x_at | 1.633460922 | 4.137E-06 | 3.9225E-05 | Rpl13a     | 1.136151209 | 0.007780321 | 0.004265377 |
| JUN      | jun oncogene                                         | 201465_s_at | 1.613962121 | 0.0004109 | 0.00332772 | Jun        | 1.473667541 | 0.000595168 | 0.033627549 |
| DDX58    | DEAD (Asp-Glu-Ala-Asp) box polypeptide 58            | 218943_s_at | 1.610115182 | 1.367E-06 | 1.8947E-05 | Ddx58      | 1.536188228 | 0.000595168 | 0.020185681 |
| SIVA1    | SIVA1, apoptosis-inducing factor                     | 203489_at   | 1.603504532 | 6.22E-06  | 6.5708E-05 | Siva1      | 1.126455186 | 0.007798116 | 0.032638564 |
| CD44     | CD44 molecule (Indian blood group)                   | 217523_at   | 1.60268246  | 0.0001204 | 0.0001795  | Cd44       | 3.669944538 | 0.000238858 | 0.009318602 |
| ZFP36L1  | zinc finger protein 36, C3H type-like 1              | 211962_s_at | 1.595804594 | 1.021E-08 | 5.54E-07   | Zfp36l1    | 1.105105295 | 0.007802665 | 0.041414048 |
| ABCA1    | ATP-binding cassette, sub-family A (ABC1), member 1  | 203505_at   | 1.586022916 | 1.594E-06 | 2.4799E-05 | Abca1      | 1.538189814 | 1.87131E-05 | 0.027369132 |
| FAM111A  | family with sequence similarity 111, member A        | 218248_at   | 1.584919606 | 1.71E-08  | 4.51E-07   | Fam111a    | 2.011225302 | 0.000595168 | 0.008259275 |
| HEY1     | hairy/enhancer-of-split related with YRPW motif 1    | 218839_at   | 1.581324144 | 1.496E-06 | 4.4134E-05 | Hey1       | 1.562488927 | 0.000595168 | 0.00581477  |
| PSIP1    | PC4 and SFRS1 interacting protein 1                  | 209337_at   | 1.580720239 | 0.0003935 | 0.00135045 | Psip1      | 1.011342505 | 0.007780321 | 0.019860658 |
| SMC4     | structural maintenance of chromosomes 4              | 201663_s_at | 1.566319151 | 5.249E-09 | 2.20E-07   | Smc4       | 1.493921227 | 0.007802665 | 0.007158253 |
| RRM2     | ribonucleotide reductase M2                          | 209773_s_at | 1.563791973 | 2.723E-06 | 2.5594E-05 | Rrm2       | 1.907634011 | 0.007780321 | 0.013466324 |
| CD44     | CD44 molecule (Indian blood group)                   | 209835_x_at | 1.561825    | 0.0003449 | 0.00042065 | Cd44       | 3.669944538 | 0.000238858 | 0.009318602 |
| RPS24    | ribosomal protein S24                                | 200061_s_at | 1.55763667  | 8.566E-06 | 6.8394E-05 | Rps24      | 1.38037146  | 7.52918E-05 | 0.005402386 |
| CCR5     | chemokine (C-C motif) receptor 5                     | 206991_s_at | 1.55739552  | 0.0002553 | 0.00036881 | Ccr5       | 1.164635265 | 0.000238858 | 0.019970566 |
| RPL13A   | ribosomal protein L13a                               | 210646_x_at | 1.557233751 | 9.18E-06  | 6.9135E-05 | Rpl13a     | 1.136151209 | 0.007780321 | 0.004265377 |
| FZD6     | frizzled homolog 6 (Drosophila)                      | 203987_at   | 1.554977105 | 0.0005981 | 0.00103435 | Fzd6       | 1.098115273 | 0.000595168 | 0.032187212 |
|          |                                                      |             |             |           |            | 8430408G22 |             |             |             |
| C10orf10 | chromosome 10 open reading frame 10                  | 209182_s_at | 1.537333212 | 7.027E-07 | 5.01E-06   | Rik        | 3.909310722 | 0.000222151 | 0.007872015 |

|          |                                                                                                                             |             |             |           |            |         |             |             |             |
|----------|-----------------------------------------------------------------------------------------------------------------------------|-------------|-------------|-----------|------------|---------|-------------|-------------|-------------|
| GALNT12  | UDP-N-acetyl-alpha-D-galactosamine:polypeptide N-acetylgalactosaminyltransferase 12 (GalNac-T12)                            | 218885_s_at | 1.532021082 | 0.0014377 | 0.00304158 | Galnt12 | 1.118813352 | 0.000595168 | 0.018476332 |
| ACTN1    | actinin, alpha 1                                                                                                            | 208636_at   | 1.528970299 | 0.0004281 | 0.00111323 | Actn1   | 2.871528808 | 1.87131E-05 | 0.003999209 |
| RRM2     | ribonucleotide reductase M2                                                                                                 | 201890_at   | 1.519704515 | 0.0010065 | 0.00165911 | Rrm2    | 1.907634011 | 0.007780321 | 0.013466324 |
| CD44     | CD44 molecule (Indian blood group)<br>integrin, alpha M (complement component 3 receptor)                                   | 204490_s_at | 1.518688126 | 0.0004518 | 0.00054541 | Cd44    | 3.669944538 | 0.000238858 | 0.009318602 |
| ITGAM    | 3 subunit)                                                                                                                  | 205786_s_at | 1.514962777 | 0.000918  | 0.00108842 | Itgam   | 2.41032591  | 0.000595168 | 0.013252425 |
| RPS6     | ribosomal protein S6                                                                                                        | 200081_s_at | 1.514659441 | 1.954E-06 | 2.6226E-05 | Rps6    | 1.028979109 | 0.007780321 | 0.003719205 |
| RRM1     | ribonucleotide reductase M1                                                                                                 | 201477_s_at | 1.511413472 | 3.237E-07 | 6.03E-06   | Rrm1    | 1.740085178 | 0.007780321 | 0.004265377 |
| RPL18    | ribosomal protein L18                                                                                                       | 200022_at   | 1.506906263 | 0.0006017 | 0.00165131 | Rpl18   | 1.118218094 | 0.007780321 | 0.006370993 |
| SMAD7    | SMAD family member 7                                                                                                        | 204790_at   | 1.495264169 | 0.0002373 | 0.0010123  | Smad7   | 1.320724701 | 0.007802665 | 0.008781244 |
| RPS16    | ribosomal protein S16                                                                                                       | 201258_at   | 1.491271061 | 0.0001355 | 0.00048014 | Rps16   | 1.373876111 | 0.007780321 | 0.003719205 |
| DBF4     | DBF4 homolog (S. cerevisiae)                                                                                                | 204244_s_at | 1.48861272  | 2.363E-08 | 6.32E-07   | Dbf4    | 1.460851775 | 0.000238858 | 0.006204801 |
| NFE2L2   | nuclear factor (erythroid-derived 2)-like 2                                                                                 | 201146_at   | 1.485591958 | 0.0023373 | 0.00549568 | Nfe2l2  | 1.245926879 | 0.007780321 | 0.00651839  |
| MAD2L1   | MAD2 mitotic arrest deficient-like 1 (yeast)                                                                                | 203362_s_at | 1.479936513 | 7.087E-05 | 0.00022113 | Mad2l1  | 2.603634145 | 0.000595168 | 0.004848253 |
| TAGLN2   | transgelin 2                                                                                                                | 210978_s_at | 1.478686006 | 7.682E-10 | 3.20E-08   | Tagln2  | 1.202240994 | 0.007802665 | 0.008184445 |
| RPS8     | ribosomal protein S8                                                                                                        | 200858_s_at | 1.471086934 | 2.011E-06 | 2.2347E-05 | Rps8    | 1.192944308 | 0.007780321 | 0.010846031 |
| TGFB1    | transforming growth factor, beta 1<br>methylenetetrahydrofolate dehydrogenase (NADP+ dependent) 2, methenyltetrahydrofolate | 203085_s_at | 1.469250145 | 2.465E-07 | 3.13E-06   | Tgfb1   | 1.470515615 | 0.007802665 | 0.007761234 |
| MTHFD2   | cyclohydrolase                                                                                                              | 201761_at   | 1.465408836 | 0.0275902 | 0.03092514 | Mthfd2  | 1.36571205  | 0.000775725 | 0.015224477 |
| APAF1    | apoptotic peptidase activating factor 1                                                                                     | 204859_s_at | 1.458220359 | 2.556E-06 | 2.8137E-05 | Apaf1   | 1.061911779 | 8.09679E-05 | 0.00979781  |
| NUSAP1   | nucleolar and spindle associated protein 1                                                                                  | 218039_at   | 1.456025675 | 0.0003244 | 0.00072936 | Nusap1  | 1.275009801 | 0.007780321 | 0.019031802 |
| HLA-DQB1 | major histocompatibility complex, class II, DQ beta 1                                                                       | 212999_x_at | 1.449880557 | 0.0036522 | 0.00347992 | H2-Ab1  | 1.866453025 | 0.000595168 | 0.036869055 |
| TOPBP1   | topoisomerase (DNA) II binding protein 1<br>inhibitor of DNA binding 4, dominant negative helix-                            | 202633_at   | 1.439928797 | 3.844E-05 | 0.00013673 | Topbp1  | 1.401582902 | 0.007802665 | 0.004792656 |
| ID4      | loop-helix protein<br>solute carrier family 7, (cationic amino acid                                                         | 209291_at   | 1.436846349 | 0.0030569 | 0.01388381 | Id4     | 1.592377012 | 0.000595168 | 0.008245759 |
| SLC7A11  | transporter, y+ system) member 11                                                                                           | 209921_at   | 1.4122589   | 0.0150727 | 0.01875651 | Slc7a11 | 2.639476254 | 0.007802665 | 0.013144676 |
| FZD7     | frizzled homolog 7 (Drosophila)                                                                                             | 203706_s_at | 1.408029074 | 0.0027719 | 0.0054721  | Fzd7    | 1.312225533 | 0.000595168 | 0.032716761 |
| CKAP2    | cytoskeleton associated protein 2                                                                                           | 218252_at   | 1.394882095 | 0.0002926 | 0.00069456 | Ckap2   | 1.023750406 | 0.000238858 | 0.03928499  |
| DPYSL2   | dihydropyrimidinase-like 2                                                                                                  | 200762_at   | 1.394854965 | 0.0004077 | 0.00232075 | Dpysl2  | 1.139878061 | 0.000595168 | 0.021627141 |
| TES      | testis derived transcript (3 LIM domains)<br>Gardner-Rasheed feline sarcoma viral (v-fgr)                                   | 202719_s_at | 1.394311738 | 0.0002531 | 0.000801   | Tes     | 1.45483277  | 0.007802665 | 0.008380722 |
| FGR      | oncogene homolog<br>asp (abnormal spindle) homolog, microcephaly                                                            | 208438_s_at | 1.392238999 | 0.000709  | 0.00205076 | Fgr     | 1.060351095 | 0.000595168 | 0.026807882 |
| ASPM     | associated (Drosophila)                                                                                                     | 219918_s_at | 1.389121756 | 3.118E-07 | 5.7455E-05 | Aspm    | 1.647476757 | 8.09679E-05 | 0.004301058 |
| IQGAP1   | IQ motif containing GTPase activating protein 1                                                                             | 210840_s_at | 1.384136355 | 5.343E-06 | 5.387E-05  | Iqgap1  | 1.211277119 | 0.000595168 | 0.026120175 |
| TUBA1B   | tubulin, alpha 1b                                                                                                           | 211072_x_at | 1.373612632 | 2.856E-05 | 0.00012792 | Tuba1b  | 1.726518982 | 0.007802665 | 0.006937559 |
| TUBA1B   | tubulin, alpha 1b                                                                                                           | 211058_x_at | 1.372279491 | 3.031E-05 | 0.0001356  | Tuba1b  | 1.726518982 | 0.007802665 | 0.006937559 |
| TNC      | tenascin C                                                                                                                  | 201645_at   | 1.368974955 | 0.0205193 | 0.02112412 | Tnc     | 1.850211565 | 0.007802665 | 0.011527786 |
| RPL10A   | ribosomal protein L10a                                                                                                      | 200036_s_at | 1.349683536 | 2.716E-05 | 0.00015521 | Rpl10a  | 1.213345435 | 0.007780321 | 0.00637081  |
| RUNX1    | runt-related transcription factor 1                                                                                         | 209360_s_at | 1.349406815 | 0.0001514 | 0.00024798 | Runx1   | 1.883690791 | 0.007780321 | 0.014126999 |
| RPS3     | ribosomal protein S3<br>signal transducer and activator of transcription 3                                                  | 208692_at   | 1.338447452 | 0.0001718 | 0.00073358 | Rps3    | 1.089664778 | 0.007780321 | 0.012438088 |
| STAT3    | (acute-phase response factor)                                                                                               | 208992_s_at | 1.33433166  | 6.068E-07 | 4.58E-06   | Stat3   | 1.54238492  | 0.007802665 | 0.006488247 |
| AKAP12   | A kinase (PRKA) anchor protein 12                                                                                           | 210517_s_at | 1.319549379 | 0.0009633 | 0.00318365 | Akap12  | 2.700203635 | 8.09679E-05 | 0.013987112 |

|          |                                                                                  |             |             |           |            |           |             |             |             |
|----------|----------------------------------------------------------------------------------|-------------|-------------|-----------|------------|-----------|-------------|-------------|-------------|
| RPLP0    | ribosomal protein, large, P0                                                     | 211972_x_at | 1.318451942 | 0.0005607 | 0.00154758 | Rplp0     | 1.274236611 | 0.007780321 | 0.004872785 |
| SLC1A4   | solute carrier family 1 (glutamate/neutral amino acid transporter), member 4     | 209610_s_at | 1.315208749 | 9.239E-06 | 5.7455E-05 | Slc1a4    | 2.128958724 | 0.007802665 | 0.009817006 |
| TAP1     | (MDR/TAP)                                                                        | 202307_s_at | 1.310427812 | 7.01E-06  | 4.4111E-05 | Tap1      | 2.620103312 | 0.007802665 | 0.005367993 |
| SMC5     | structural maintenance of chromosomes 5                                          | 212926_at   | 1.306991457 | 2.022E-07 | 9.28E-06   | Smc5      | 1.094262819 | 0.007802665 | 0.015987408 |
| PCNA     | proliferating cell nuclear antigen                                               | 201202_at   | 1.300837994 | 0.0024622 | 0.00454934 | Pcna      | 1.409175048 | 0.007780321 | 0.008706517 |
| MAP4K3   | mitogen-activated protein kinase kinase kinase 3                                 | 218311_at   | 1.298942048 | 0.0077806 | 0.01341984 | Map4k3    | 1.200563842 | 0.000595168 | 0.00997434  |
| FLNA     | filamin A, alpha                                                                 | 213746_s_at | 1.283274811 | 7.655E-09 | 2.15E-07   | Flna      | 1.79862918  | 0.000595168 | 0.007137421 |
| CCNA2    | cyclin A2                                                                        | 213226_at   | 1.273892556 | 6.406E-06 | 3.4379E-05 | Ccna2     | 2.904801283 | 0.000238858 | 0.004848253 |
| RPL4     | ribosomal protein L4                                                             | 211710_x_at | 1.26570652  | 0.0007203 | 0.00176748 | Rpl4      | 1.001516847 | 0.007780321 | 0.003719205 |
| CDH6     | cadherin 6, type 2, K-cadherin (fetal kidney)                                    | 214803_at   | 1.26426911  | 0.0063728 | 0.03436021 | Cdh6      | 4.275730765 | 0.000238858 | 0.005826814 |
| ABCC1    | ATP-binding cassette, sub-family C (CFTR/MRP), member 1                          | 202804_at   | 1.264240953 | 0.0003188 | 0.00065197 | Abcc1     | 1.11990213  | 1.87131E-05 | 0.007479413 |
| CD44     | CD44 molecule (Indian blood group)                                               | 212014_x_at | 1.258631721 | 0.0018537 | 0.00184498 | Cd44      | 3.669944538 | 0.000238858 | 0.009318602 |
| SERPINB1 | serpin peptidase inhibitor, clade B (ovalbumin), member 1                        | 212268_at   | 1.254412225 | 0.0013936 | 0.00286624 | Serpinb1a | 1.931404606 | 0.007798116 | 0.031575959 |
| RACGAP1  | Rac GTPase activating protein 1                                                  | 222077_s_at | 1.249893151 | 1.039E-06 | 8.68E-06   | Racgap1   | 2.709826349 | 0.007780321 | 0.009956025 |
| ENC1     | ectodermal-neural cortex 1 (with BTB-like domain)                                | 201341_at   | 1.244372742 | 0.0002829 | 0.00063957 | Enc1      | 1.879612551 | 0.000595168 | 0.012297682 |
| RPL4     | ribosomal protein L4                                                             | 201154_x_at | 1.244106065 | 0.0007178 | 0.00175277 | Rpl4      | 1.001516847 | 0.007780321 | 0.003719205 |
| SERPINB1 | serpin peptidase inhibitor, clade B (ovalbumin), member 1                        | 213572_s_at | 1.241827304 | 2.759E-05 | 0.00014928 | Serpinb1a | 1.931404606 | 0.007798116 | 0.031575959 |
| EMP2     | epithelial membrane protein 2                                                    | 204975_at   | 1.240351181 | 0.0018483 | 0.0056493  | Emp2      | 1.585036953 | 0.000595168 | 0.005044732 |
| PARP12   | poly (ADP-ribose) polymerase family, member 12                                   | 218543_s_at | 1.235271624 | 0.0003969 | 0.00071815 | Parp12    | 1.393622083 | 0.007780321 | 0.031559113 |
| COL4A2   | collagen, type IV, alpha 2                                                       | 211966_at   | 1.230088436 | 0.0011498 | 0.00648696 | Col4a2    | 1.937089185 | 0.000238858 | 0.005826814 |
| LPP      | LIM domain containing preferred translocation partner in lipoma                  | 202821_s_at | 1.228374951 | 1.281E-06 | 1.351E-05  | Lpp       | 1.016570491 | 0.000595168 | 0.008764431 |
| CASP4    | caspase 4, apoptosis-related cysteine peptidase                                  | 209310_s_at | 1.223641117 | 0.0039818 | 0.00675347 | Casp4     | 1.912438296 | 0.000238858 | 0.024593856 |
| MYOF     | myoferlin                                                                        | 201798_s_at | 1.213358208 | 0.0011575 | 0.0022902  | Myof      | 2.840139464 | 0.007780321 | 0.007788227 |
| STAT3    | signal transducer and activator of transcription 3 (acute-phase response factor) | 208991_at   | 1.212758162 | 0.0009634 | 0.0025795  | Stat3     | 1.54238492  | 0.007802665 | 0.006488247 |
| JUN      | jun oncogene                                                                     | 201466_s_at | 1.210108599 | 0.0096944 | 0.02833529 | Jun       | 1.473667541 | 0.000595168 | 0.033627549 |
| TNFRSF1B | tumor necrosis factor receptor superfamily, member 1B                            | 203508_at   | 1.206394604 | 7.874E-06 | 3.0519E-05 | Tnfrsf1b  | 1.496649657 | 0.007802665 | 0.009170285 |
| MCM3     | minichromosome maintenance complex component 3                                   | 201555_at   | 1.188152593 | 1.377E-05 | 7.0776E-05 | Mcm3      | 2.181711819 | 0.000595168 | 0.011793838 |
| ANKRD6   | ankyrin repeat domain 6                                                          | 204671_s_at | 1.1756397   | 0.0007556 | 0.00198975 | Ankrd6    | 1.928069067 | 8.09679E-05 | 0.005931314 |
| PABPC4   | poly(A) binding protein, cytoplasmic 4 (inducible form)                          | 201064_s_at | 1.163186054 | 3.448E-05 | 0.0001866  | Pabpc4    | 1.059700601 | 0.007780321 | 0.025941479 |
| CSNK1E   | casein kinase 1, epsilon                                                         | 202332_at   | 1.160867928 | 0.0001556 | 0.00106313 | Csnk1e    | 1.352771194 | 0.000238858 | 0.017805584 |
| HEY1     | hairly/enhancer-of-split related with YRPW motif 1                               | 44783_s_at  | 1.159948285 | 0.0002481 | 0.00114196 | Hey1      | 1.562488927 | 0.000595168 | 0.00581477  |
| RPL31    | ribosomal protein L31                                                            | 200963_x_at | 1.154468779 | 0.0001677 | 0.00059859 | Rpl31     | 1.130333373 | 0.007780321 | 0.01185412  |
| RAD50    | RAD50 homolog (S. cerevisiae)                                                    | 208393_s_at | 1.153160863 | 1.878E-05 | 0.00011239 | Rad50     | 1.004085148 | 0.007780321 | 0.02421305  |
| RPS18    | ribosomal protein S18                                                            | 201049_s_at | 1.152439299 | 2.543E-05 | 0.00014388 | Rps18     | 1.066351511 | 0.007780321 | 0.006966164 |
| NOTCH2   | Notch homolog 2 (Drosophila)                                                     | 212377_s_at | 1.151413222 | 0.0040523 | 0.00667083 | Notch2    | 1.062996429 | 0.007780321 | 0.012992972 |
| RPL4     | ribosomal protein L4                                                             | 200089_s_at | 1.151059644 | 0.0002962 | 0.00087672 | Rpl4      | 1.001516847 | 0.007780321 | 0.003719205 |
| LY6E     | lymphocyte antigen 6 complex, locus E                                            | 202145_at   | 1.147850933 | 0.0012057 | 0.00151152 | Ly6e      | 1.402573165 | 0.000595168 | 0.043478942 |

|          |                                                                                                                        |             |             |           |            |          |             |             |             |
|----------|------------------------------------------------------------------------------------------------------------------------|-------------|-------------|-----------|------------|----------|-------------|-------------|-------------|
| LAMC1    | laminin, gamma 1 (formerly LAMB2)                                                                                      | 200771_at   | 1.144715539 | 0.000215  | 0.0009117  | Lamc1    | 1.74523086  | 0.000595168 | 0.005131332 |
| STC2     | stanniocalcin 2                                                                                                        | 203439_s_at | 1.143506291 | 0.0019779 | 0.00252913 | Stc2     | 1.20740991  | 0.007802665 | 0.009867959 |
| KIF11    | kinesin family member 11                                                                                               | 204444_at   | 1.133633864 | 1.008E-06 | 1.8362E-05 | Kif11    | 2.151498749 | 0.000595168 | 0.004388891 |
| CEP55    | centrosomal protein 55kDa                                                                                              | 218542_at   | 1.122078288 | 2.362E-06 | 0.00039744 | Cep55    | 1.782294441 | 0.000526475 | 0.011192816 |
| RBL1     | retinoblastoma-like 1 (p107)                                                                                           | 205296_at   | 1.117961897 | 2.163E-07 | 2.97E-06   | Rbl1     | 1.804742465 | 0.007780321 | 0.008160217 |
| RHBDP2   | rhomboid 5 homolog 2 (Drosophila)                                                                                      | 219202_at   | 1.112677335 | 2.16E-07  | 4.306E-05  | Rhbdp2   | 1.093832857 | 0.007780321 | 0.004265377 |
| CKS1B    | CDC28 protein kinase regulatory subunit 1B                                                                             | 201897_s_at | 1.096925004 | 0.000105  | 0.00026222 | Cks1b    | 1.264671286 | 0.000238858 | 0.012395718 |
| TBC1D8   | TBC1 domain family, member 8 (with GRAM domain)                                                                        | 204526_s_at | 1.09649244  | 0.0002919 | 0.00074704 | Tbc1d8   | 1.102271645 | 0.007802665 | 0.008906826 |
| IQGAP1   | IQ motif containing GTPase activating protein 1                                                                        | 200791_s_at | 1.089774198 | 0.0055787 | 0.01123028 | Iqgap1   | 1.211277119 | 0.000595168 | 0.026120175 |
| PBK      | PDZ binding kinase                                                                                                     | 219148_at   | 1.08634706  | 0.0001487 | 0.00029134 | Pbk      | 1.858079031 | 0.007780321 | 0.005054216 |
| GINS1    | GINS complex subunit 1 (Psf1 homolog)                                                                                  | 206102_at   | 1.076755707 | 0.0007729 | 0.00135264 | Gins1    | 1.20433334  | 0.000595168 | 0.011998298 |
| PRSS23   | protease, serine, 23                                                                                                   | 202458_at   | 1.069520657 | 3.811E-05 | 0.00063228 | Prss23   | 1.306759828 | 0.007780321 | 0.035603101 |
| ITGA5    | integrin, alpha 5 (fibronectin receptor, alpha polypeptide)                                                            | 201389_at   | 1.068003884 | 4.382E-06 | 5.0387E-05 | Itga5    | 1.052882475 | 0.000595168 | 0.014226483 |
| FANCI    | Fanconi anemia, complementation group I solute carrier family 25 (mitochondrial carrier; phosphate carrier), member 24 | 213007_at   | 1.064422825 | 6.392E-07 | 5.60E-06   | Fanci    | 1.014979349 | 0.000595168 | 0.025022456 |
| SLC25A24 |                                                                                                                        | 204342_at   | 1.064310755 | 0.0007738 | 0.00179096 | Slc25a24 | 2.180721628 | 0.007802665 | 0.009817006 |
| SERPINE1 | serpin peptidase inhibitor, clade E (nexin, plasminogen activator inhibitor type 1), member 1                          | 202627_s_at | 1.06243415  | 0.0130552 | 0.01110799 | Serpine1 | 2.381017392 | 0.007798116 | 0.026966312 |
| RAD54B   | RAD54 homolog B (S. cerevisiae)                                                                                        | 219494_at   | 1.057325089 | 0.0026334 | 0.00385028 | Rad54b   | 1.529145589 | 0.007780321 | 0.010623959 |
| MAP3K14  | mitogen-activated protein kinase kinase kinase 14                                                                      | 205192_at   | 1.0547487   | 1.046E-06 | 1.0737E-05 | Map3k14  | 1.096603636 | 0.000595168 | 0.025972782 |
| RPL5     | ribosomal protein L5                                                                                                   | 200937_s_at | 1.048297134 | 0.0055285 | 0.01070242 | Rpl5     | 1.099031049 | 0.007780321 | 0.005299781 |
| TRAF5    | TNF receptor-associated factor 5                                                                                       | 204352_at   | 1.042120375 | 0.0054772 | 0.006397   | Traf5    | 1.004654929 | 0.007802665 | 0.007784547 |
| MELK     | maternal embryonic leucine zipper kinase                                                                               | 204825_at   | 1.041269506 | 0.0002835 | 0.00058649 | Melk     | 1.783039135 | 0.000595168 | 0.013178262 |
| RPL7     | ribosomal protein L7                                                                                                   | 212042_x_at | 1.041094803 | 0.0061245 | 0.01107803 | Rpl7     | 1.211323876 | 0.007780321 | 0.020856215 |
| MCAM     | melanoma cell adhesion molecule                                                                                        | 211042_x_at | 1.040000061 | 4.435E-06 | 2.7759E-05 | Mcam     | 1.010818978 | 0.000595168 | 0.025456091 |
| SERPINE1 | serpin peptidase inhibitor, clade E (nexin, plasminogen activator inhibitor type 1), member 1                          | 202628_s_at | 1.035563239 | 0.0163149 | 0.0138297  | Serpine1 | 2.381017392 | 0.007798116 | 0.026966312 |
| TTK      | TTK protein kinase                                                                                                     | 204822_at   | 1.023660976 | 3.886E-05 | 0.00038267 | Ttk      | 1.283789306 | 0.007802665 | 0.01229718  |
| SVIL     | supervillin                                                                                                            | 202565_s_at | 1.022952729 | 2.483E-05 | 0.00014281 | Svil     | 1.053838879 | 0.001070955 | 0.015793979 |
| EEF1B2   | eukaryotic translation elongation factor 1 beta 2                                                                      | 200705_s_at | 1.011292642 | 0.0002301 | 0.00090809 | Eef1b2   | 1.005652568 | 0.000595168 | 0.024079361 |



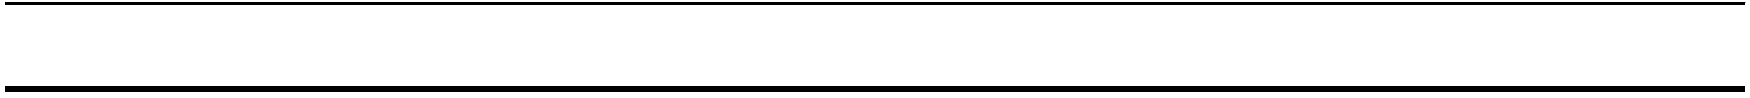

Supplement: 10.1074_M116.745208_jbc.M116.745208-2.pdf [file 10.1074_M116.745208_jbc.M116.745208-2.pdf]
