# Supplementary material
Source: PubMed Central journal article supplement (PMC5247657)

Supp Table 5 : Patient characteristics of CCRCC patients included in the epigenomic analysis

| Sample ID | Tumor histology | Gender | Age | DM | HTN | ESRD | Serum Creatinine (gm/dl) | Metastasis                                                             |
|-----------|-----------------|--------|-----|----|-----|------|--------------------------|------------------------------------------------------------------------|
| 1         | CCRCC           | F      | 84  | N  | Y   | N    | 0.9                      | Extends beyond renal capsule, Tumor thrombus in renal vein, Adenopathy |
| 3         | CCRCC           | F      | 62  | N  | Y   | N    | 1.2                      | N                                                                      |
| 4         | CCRCC           | F      | 57  | Y  | Y   | N    | 1.3                      | N                                                                      |
| 6         | CCRCC           | F      | 63  | N  | N   | N    | 1.3                      | N                                                                      |
| 8         | CCRCC           | M      | 58  | Y  | Y   | Y    | 1                        | N                                                                      |
| 10        | CCRCC           | M      | 69  | Y  | Y   | N    | 1                        | N                                                                      |
| 11        | CCRCC           | M      | 48  | Y  | Y   | N    | 1.3                      | Extension into perinephric tissue, renal sinus, renal vein             |
| 12        | CCRCC           | M      | 66  | N  | Y   | CKD  | 2.4                      | N                                                                      |
| 13        | CCRCC           | F      | 54  | Y  | N   | N    | 0.9                      | Adenopathy+                                                            |
| 14        | CCRCC           | M      | 47  | Y  | Y   | Y    | 12.6                     | Bilateral kidney lesions                                               |
| 19        | CCRCC           | F      | 69  | N  | Y   | N    | 1                        | Extends into renal vein                                                |
| 21        | CCRCC           | F      | 18  | N  | N   | N    | 1                        | N                                                                      |
| 22        | CCRCC           | F      | 65  | N  | N   | Y    | 5.8                      | N                                                                      |

HTN: Hypertension, ESRD: End stage renal disease, DM: Diabetes Mellitus,

---

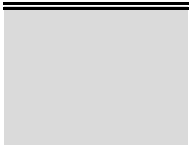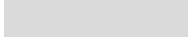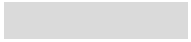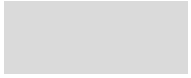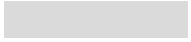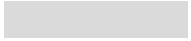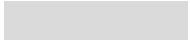

Supplement: 10.1074_M116.745208_jbc.M116.745208-4.pdf [file 10.1074_M116.745208_jbc.M116.745208-4.pdf]
