# Supplementary material
Source: PubMed Central journal article supplement (PMC5247657)
Supplement: 10.1074_M116.745208_jbc.M116.745208-1.pdf [file 10.1074_M116.745208_jbc.M116.745208-1.pdf]

**Supp Table 1: Gene that are aberrantly hypomethylated in CCRCC**

| ID                       | P Value  | Diff in Methylation (CCRCC-Ctrl, HpaII/MspI) | Refseq ID | Gene Symbol | Genomic Location |
|--------------------------|----------|----------------------------------------------|-----------|-------------|------------------|
| chr9:136848528-136848700 | 0.043831 | 1.159852212                                  | NM_00009  | COL5A1      | Gene Body        |
| chr6:6090996-6091977     | 0.047199 | 1.22411938                                   | NM_00012  | F13A1       | Gene Body        |
| chr9:70845328-70846385   | 0.042286 | 1.040307877                                  | NM_00014  | FXN         | Gene Body        |
| chr20:10578197-10578810  | 0.046921 | 1.038566865                                  | NM_00021  | JAG1        | Gene Body        |
| chr3:3107552-3107789     | 0.042906 | 1.175287425                                  | NM_00056  | IL5RA       | Gene Body        |
| chr4:46980457-46980720   | 0.048493 | 1.066082531                                  | NM_00081  | GABRB1      | Gene Body        |
| chr3:68902831-68903070   | 0.042982 | 1.209174564                                  | NM_00100  | FAM19A4     | Gene Body        |
| chr7:2230708-2231018     | 0.048937 | 1.461358323                                  | NM_00101  | MAD1L1      | Gene Body        |
| chr7:2230708-2231018     | 0.048937 | 1.461358323                                  | NM_00101  | MAD1L1      | Gene Body        |
| chr7:71393937-71394625   | 0.047872 | 1.034428734                                  | NM_00101  | CALN1       | Gene Body        |
| chr9:86760915-86761105   | 0.048491 | 1.08275272                                   | NM_00101  | NTRK2       | Gene Body        |
| chr3:65661080-65662059   | 0.042896 | 1.050877561                                  | NM_00103  | MAGI1       | Gene Body        |
| chr5:170021435-170021915 | 0.045755 | 1.271975133                                  | NM_00103  | KCNIP1      | Gene Body        |
| chr5:170021435-170021915 | 0.045755 | 1.271975133                                  | NM_00103  | KCNIP1      | Gene Body        |
| chr8:95746452-95747192   | 0.044261 | 1.197665987                                  | NM_00103  | RBM35A      | Gene Body        |
| chr3:155578144-155578657 | 0.047834 | 1.123291541                                  | NM_00103  | GPR149      | Gene Body        |
| chr7:153596545-153598256 | 0.045964 | 1.150567488                                  | NM_00103  | DPP6        | Gene Body        |
| chr7:153705252-153705937 | 0.04739  | 1.158266403                                  | NM_00103  | DPP6        | Gene Body        |
| chr7:154003419-154004479 | 0.046886 | 1.217993877                                  | NM_00103  | DPP6        | Gene Body        |
| chr7:154220278-154221753 | 0.044961 | 1.099343623                                  | NM_00103  | DPP6        | Gene Body        |
| chr7:154256832-154257841 | 0.048992 | 1.035477098                                  | NM_00103  | DPP6        | Gene Body        |
| chr9:9394259-9395026     | 0.043293 | 1.302845194                                  | NM_00104  | PTPRD       | Gene Body        |
| chr20:34560429-34560635  | 0.045968 | 1.044474314                                  | NM_00104  | DLGAP4      | Gene Body        |
| chr2:137988991-137989328 | 0.049055 | 1.139175849                                  | NM_00108  | THSD7B      | Gene Body        |
| chr4:183837395-183837889 | 0.043289 | 1.334838585                                  | NM_00108  | ODZ3        | Gene Body        |
| chr22:47332733-47333131  | 0.047295 | 1.12489838                                   | NM_00108  | FAM19A5     | Gene Body        |
| chr2:173617096-173617203 | 0.042986 | 1.154099373                                  | NM_00110  | RAPGEF4     | Gene Body        |
| chr5:166856364-166857408 | 0.045813 | 1.101811616                                  | NM_00112  | ODZ2        | Gene Body        |
| chr8:95746452-95747192   | 0.044261 | 1.197665987                                  | NM_00112  | RBM35A      | Gene Body        |
| chr8:95746452-95747192   | 0.044261 | 1.197665987                                  | NM_00112  | RBM35A      | Gene Body        |
| chr8:95746452-95747192   | 0.044261 | 1.197665987                                  | NM_00112  | RBM35A      | Gene Body        |
| chr8:68746914-68747442   | 0.042666 | 1.075877619                                  | NM_00112  | CPA6        | Gene Body        |
| chr5:11685009-11686629   | 0.042965 | 1.043187398                                  | NM_00133  | CTNND2      | Gene Body        |
| chr21:40308111-40309193  | 0.045843 | 1.135895824                                  | NM_00138  | DSCAM       | Gene Body        |
| chr21:40583800-40584341  | 0.044938 | 1.116371402                                  | NM_00138  | DSCAM       | Gene Body        |
| chr21:41118588-41119205  | 0.042717 | 1.147854217                                  | NM_00138  | DSCAM       | Gene Body        |
| chrX:135079407-135080564 | 0.044454 | 1.038053437                                  | NM_00144  | FHL1        | Gene Body        |
| chr7:153705252-153705937 | 0.04739  | 1.158266403                                  | NM_00193  | DPP6        | Gene Body        |
| chr7:154003419-154004479 | 0.046886 | 1.217993877                                  | NM_00193  | DPP6        | Gene Body        |
| chr7:154220278-154221753 | 0.044961 | 1.099343623                                  | NM_00193  | DPP6        | Gene Body        |

|                          |          |             |          |          |           |
|--------------------------|----------|-------------|----------|----------|-----------|
| chr7:154256832-154257841 | 0.048992 | 1.035477098 | NM_00193 | DPP6     | Gene Body |
| chr5:127704688-127705875 | 0.0497   | 1.077229658 | NM_00195 | FBN2     | Gene Body |
| chr21:38025652-38026855  | 0.042291 | 1.393160283 | NM_00224 | KCNJ6    | Gene Body |
| chr4:55643527-55644486   | 0.048075 | 1.221994277 | NM_00225 | KDR      | Gene Body |
| chr9:9394259-9395026     | 0.043293 | 1.302845194 | NM_00283 | PTPRD    | Gene Body |
| chr7:157050959-157051668 | 0.04528  | 1.168981381 | NM_00284 | PTPRN2   | Gene Body |
| chr7:157285808-157286126 | 0.04497  | 1.020103731 | NM_00284 | PTPRN2   | Gene Body |
| chr7:2230708-2231018     | 0.048937 | 1.461358323 | NM_00355 | MAD1L1   | Gene Body |
| chr9:70543355-70543703   | 0.044619 | 1.301060199 | NM_00355 | PIP5K1B  | Gene Body |
| chr6:133808706-133809236 | 0.044558 | 1.137326133 | NM_00410 | EYA4     | Gene Body |
| chr2:79986105-79986921   | 0.045205 | 1.101243853 | NM_00438 | CTNNA2   | Gene Body |
| chr2:80188509-80189367   | 0.0483   | 1.164416461 | NM_00438 | CTNNA2   | Gene Body |
| chr2:80203716-80203893   | 0.04689  | 1.026410923 | NM_00438 | CTNNA2   | Gene Body |
| chr2:80348127-80348325   | 0.047159 | 1.010702607 | NM_00438 | CTNNA2   | Gene Body |
| chr21:21708955-21709618  | 0.043004 | 1.137659598 | NM_00454 | NCAM2    | Gene Body |
| chr9:93627709-93628742   | 0.046773 | 1.038687493 | NM_00456 | ROR2     | Gene Body |
| chr3:65661080-65662059   | 0.042896 | 1.050877561 | NM_00474 | MAGI1    | Gene Body |
| chr8:1589016-1589955     | 0.045761 | 1.228800113 | NM_00474 | DLGAP2   | Gene Body |
| chr8:73798508-73799313   | 0.047993 | 1.232379504 | NM_00477 | KCNB2    | Gene Body |
| chr5:169385646-169386032 | 0.044889 | 1.111801299 | NM_00494 | DOCK2    | Gene Body |
| chr20:45152983-45153500  | 0.042584 | 1.019225995 | NM_00524 | EYA2     | Gene Body |
| chr9:100187518-100188551 | 0.047467 | 1.245334642 | NM_00545 | GABBR2   | Gene Body |
| chr6:160967572-160968615 | 0.047732 | 1.020708704 | NM_00557 | LPA      | Gene Body |
| chr6:160984210-160985255 | 0.049174 | 1.019327117 | NM_00557 | LPA      | Gene Body |
| chr7:50417971-50418699   | 0.04213  | 1.196169605 | NM_00606 | IKZF1    | Gene Body |
| chr9:86760915-86761105   | 0.048491 | 1.08275272  | NM_00618 | NTRK2    | Gene Body |
| chr2:119448591-119449208 | 0.042792 | 1.054669051 | NM_00677 | MARCO    | Gene Body |
| chr3:124300293-124301146 | 0.045821 | 1.22644367  | NM_00681 | PDIA5    | Gene Body |
| chr2:173617096-173617203 | 0.042986 | 1.154099373 | NM_00702 | RAPGEF4  | Gene Body |
| chr9:119203475-119204077 | 0.048144 | 1.018209072 | NM_01401 | ASTN2    | Gene Body |
| chr5:178505757-178506787 | 0.048636 | 1.320121864 | NM_01424 | ADAMTS2  | Gene Body |
| chr5:178686706-178687073 | 0.04478  | 1.175652775 | NM_01424 | ADAMTS2  | Gene Body |
| chr9:126080799-126081041 | 0.049733 | 1.044070178 | NM_01435 | NEK6     | Gene Body |
| chr3:1120044-1120550     | 0.046949 | 1.003615146 | NM_01446 | CNTN6    | Gene Body |
| chr5:170021435-170021915 | 0.045755 | 1.271975133 | NM_01455 | KCNIP1   | Gene Body |
| chr8:53232969-53233989   | 0.044157 | 1.023761018 | NM_01468 | ST18     | Gene Body |
| chr5:147022158-147022461 | 0.047884 | 1.056725138 | NM_01475 | JAKMIP2  | Gene Body |
| chr20:34560429-34560635  | 0.045968 | 1.044474314 | NM_01490 | DLGAP4   | Gene Body |
| chr5:142220540-142221338 | 0.044833 | 1.131925828 | NM_01507 | ARHGAP26 | Gene Body |
| chr9:676433-676750       | 0.049407 | 1.003423619 | NM_01515 | KANK1    | Gene Body |
| chr6:39880975-39881468   | 0.046756 | 1.016447544 | NM_01534 | DAAM2    | Gene Body |
| chr6:151399695-151399901 | 0.04301  | 1.181575585 | NM_01544 | MTHFD1L  | Gene Body |
| chr3:65661080-65662059   | 0.042896 | 1.050877561 | NM_01552 | MAGI1    | Gene Body |
| chr3:55556611-55557074   | 0.042293 | 1.061345361 | NM_01557 | ERC2     | Gene Body |
| chr4:155378697-155378888 | 0.047    | 1.087948168 | NM_01763 | DCHS2    | Gene Body |
| chr8:95746452-95747192   | 0.044261 | 1.197665987 | NM_01765 | RBM35A   | Gene Body |
| chr8:10731685-10732329   | 0.044439 | 1.089242661 | NM_01788 | PINX1    | Gene Body |

|                          |          |             |          |          |           |
|--------------------------|----------|-------------|----------|----------|-----------|
| chr3:54311295-54311859   | 0.041995 | 1.072208608 | NM_01835 | CACNA2D3 | Gene Body |
| chr3:54590111-54590187   | 0.047738 | 1.241654363 | NM_01835 | CACNA2D3 | Gene Body |
| chr3:54633976-54635274   | 0.042284 | 1.090730321 | NM_01835 | CACNA2D3 | Gene Body |
| chr2:141368078-141368670 | 0.047603 | 1.01354596  | NM_01855 | LRP1B    | Gene Body |
| chr2:141423902-141424825 | 0.04769  | 1.029928884 | NM_01855 | LRP1B    | Gene Body |
| chr9:19596774-19597640   | 0.043744 | 1.222545899 | NM_02034 | SLC24A2  | Gene Body |
| chr9:19768681-19769983   | 0.047786 | 1.150121934 | NM_02034 | SLC24A2  | Gene Body |
| chr8:68746914-68747442   | 0.042666 | 1.075877619 | NM_02036 | CPA6     | Gene Body |
| chr20:19387896-19389038  | 0.046596 | 1.198054752 | NM_02068 | SLC24A3  | Gene Body |
| chr20:19424894-19425889  | 0.042478 | 1.019685561 | NM_02068 | SLC24A3  | Gene Body |
| chr2:115293845-115294966 | 0.046898 | 1.009798314 | NM_02086 | DPP10    | Gene Body |
| chr7:131464656-131465968 | 0.049759 | 1.108313829 | NM_02091 | PLXNA4   | Gene Body |
| chr7:131562877-131563537 | 0.044882 | 1.312842045 | NM_02091 | PLXNA4   | Gene Body |
| chr5:178686706-178687073 | 0.04478  | 1.175652775 | NM_02155 | ADAMTS2  | Gene Body |
| chr7:70292322-70292824   | 0.049847 | 1.055525143 | NM_02247 | WBSCR17  | Gene Body |
| chr7:70332784-70333491   | 0.048597 | 1.152886723 | NM_02247 | WBSCR17  | Gene Body |
| chr7:70533654-70534223   | 0.046961 | 1.026567897 | NM_02247 | WBSCR17  | Gene Body |
| chr8:13246297-13247529   | 0.047585 | 1.283479019 | NM_02476 | DLC1     | Gene Body |
| chr20:24513984-24514889  | 0.047086 | 1.04779098  | NM_02485 | C20orf39 | Gene Body |
| chr7:71393937-71394625   | 0.047872 | 1.034428734 | NM_03146 | CALN1    | Gene Body |
| chr4:110221780-110222400 | 0.04577  | 1.098311213 | NM_03251 | COL25A1  | Gene Body |
| chr8:3153404-3153947     | 0.048326 | 1.091905024 | NM_03322 | CSMD1    | Gene Body |
| chr8:3189070-3189899     | 0.046195 | 1.043243872 | NM_03322 | CSMD1    | Gene Body |
| chr8:4205719-4206808     | 0.043367 | 1.089817728 | NM_03322 | CSMD1    | Gene Body |
| chr2:163270664-163271722 | 0.043196 | 1.183537061 | NM_03327 | KCNH7    | Gene Body |
| chr7:117158793-117159049 | 0.044706 | 1.051970327 | NM_03342 | CTTNBP2  | Gene Body |
| chr8:56572139-56572928   | 0.043862 | 1.250776645 | NM_05285 | XKR4     | Gene Body |
| chr8:113761866-113762599 | 0.044805 | 1.028776435 | NM_05290 | CSMD3    | Gene Body |
| chr8:69602285-69602890   | 0.042876 | 1.120391993 | NM_05295 | C8orf34  | Gene Body |
| chr20:57826310-57827513  | 0.045566 | 1.152838662 | NM_08067 | PHACTR3  | Gene Body |
| chr9:9394259-9395026     | 0.043293 | 1.302845194 | NM_13035 | PTPRD    | Gene Body |
| chr9:9394259-9395026     | 0.043293 | 1.302845194 | NM_13035 | PTPRD    | Gene Body |
| chr9:9394259-9395026     | 0.043293 | 1.302845194 | NM_13035 | PTPRD    | Gene Body |
| chr2:125388192-125389342 | 0.046937 | 1.002939748 | NM_13077 | CNTNAP5  | Gene Body |
| chr7:153596545-153598256 | 0.045964 | 1.150567488 | NM_13075 | DPP6     | Gene Body |
| chr7:153705252-153705937 | 0.04739  | 1.158266403 | NM_13075 | DPP6     | Gene Body |
| chr7:154003419-154004479 | 0.046886 | 1.217993877 | NM_13075 | DPP6     | Gene Body |
| chr7:154220278-154221753 | 0.044961 | 1.099343623 | NM_13075 | DPP6     | Gene Body |
| chr7:154256832-154257841 | 0.048992 | 1.035477098 | NM_13075 | DPP6     | Gene Body |
| chr7:157050959-157051668 | 0.04528  | 1.168981381 | NM_13084 | PTPRN2   | Gene Body |
| chr7:157285808-157286126 | 0.04497  | 1.020103731 | NM_13084 | PTPRN2   | Gene Body |
| chr7:157050959-157051668 | 0.04528  | 1.168981381 | NM_13084 | PTPRN2   | Gene Body |
| chr7:157285808-157286126 | 0.04497  | 1.020103731 | NM_13084 | PTPRN2   | Gene Body |
| chr22:38481295-38482578  | 0.045471 | 1.01359184  | NM_15251 | ENTHD1   | Gene Body |
| chr3:131653007-131653192 | 0.045588 | 1.001028549 | NM_15326 | COL29A1  | Gene Body |
| chr6:133808706-133809236 | 0.044558 | 1.137326133 | NM_17210 | EYA4     | Gene Body |
| chr6:133808706-133809236 | 0.044558 | 1.137326133 | NM_17210 | EYA4     | Gene Body |

|                          |          |             |                   |           |
|--------------------------|----------|-------------|-------------------|-----------|
| chr20:45152983-45153500  | 0.042584 | 1.019225995 | NM_17211EYA2      | Gene Body |
| chr20:45152983-45153500  | 0.042584 | 1.019225995 | NM_17211EYA2      | Gene Body |
| chr20:45152983-45153500  | 0.042584 | 1.019225995 | NM_17211EYA2      | Gene Body |
| chr20:45152983-45153500  | 0.042584 | 1.019225995 | NM_17211EYA2      | Gene Body |
| chr2:163270664-163271722 | 0.043196 | 1.183537061 | NM_17316KCNH7     | Gene Body |
| chr3:188168695-188169624 | 0.042176 | 1.006937069 | NM_17321ST6GAL1   | Gene Body |
| chr3:188168695-188169624 | 0.042176 | 1.006937069 | NM_17321ST6GAL1   | Gene Body |
| chr20:51173635-51174149  | 0.042079 | 1.073566757 | NM_17348TSHZ2     | Gene Body |
| chr3:3107552-3107789     | 0.042906 | 1.175287425 | NM_17572IL5RA     | Gene Body |
| chr3:3107552-3107789     | 0.042906 | 1.175287425 | NM_17572IL5RA     | Gene Body |
| chr3:3107552-3107789     | 0.042906 | 1.175287425 | NM_17572IL5RA     | Gene Body |
| chr2:149706973-149707558 | 0.046043 | 1.215884223 | NM_17796LOC130576 | Gene Body |
| chr20:57203234-57203890  | 0.043552 | 1.139222321 | NM_17845ZNF831    | Gene Body |
| chr9:70845328-70846385   | 0.042286 | 1.040307877 | NM_18142FXN       | Gene Body |
| chr3:68902831-68903070   | 0.042982 | 1.209174564 | NM_18252FAM19A4   | Gene Body |
| chr8:13246297-13247529   | 0.047585 | 1.283479019 | NM_18264DLC1      | Gene Body |
| chr20:42853680-42854641  | 0.045742 | 1.266076718 | NM_18297RIMS4     | Gene Body |
| chr20:34560429-34560635  | 0.045968 | 1.044474314 | NM_18300DLGAP4    | Gene Body |
| chr20:57826310-57827513  | 0.045566 | 1.152838662 | NM_18324PHACTR3   | Gene Body |
| chr20:57826310-57827513  | 0.045566 | 1.152838662 | NM_18324PHACTR3   | Gene Body |
| chr8:113761866-113762599 | 0.044805 | 1.028776435 | NM_19812CSMD3     | Gene Body |
| chr8:113761866-113762599 | 0.044805 | 1.028776435 | NM_19812CSMD3     | Gene Body |
| chr9:119203475-119204077 | 0.048144 | 1.018209072 | NM_19818ASTN2     | Gene Body |
| chr9:119203475-119204077 | 0.048144 | 1.018209072 | NM_19818ASTN2     | Gene Body |
| chr5:153744707-153745319 | 0.046239 | 1.200651363 | NM_19832GALNT10   | Gene Body |
| chr4:110221780-110222400 | 0.04577  | 1.098311213 | NM_19872COL25A1   | Gene Body |
| chr7:139824436-139824509 | 0.008583 | 1.000867494 | NM_01344MKRN1     | Promoter  |
| chr3:73755952-73756369   | 0.010779 | 1.001630221 | NM_01500PDZRN3    | Promoter  |
| chr5:139007939-139008052 | 0.014406 | 1.007201561 | NM_01646CXXC5     | Promoter  |
| chr1:115196282-115197824 | 0.015297 | 1.009840895 | NM_00317SYCP1     | Promoter  |
| chr2:239987457-239987681 | 0.035034 | 1.016177741 | NM_00603HDAC4     | Promoter  |
| chr20:61649448-61649899  | 0.026872 | 1.017886267 | NM_08082SRMS      | Promoter  |
| chr5:134397802-134398079 | 0.012001 | 1.024093155 | NM_00265PITX1     | Promoter  |
| chr19:1543793-1544018    | 0.00502  | 1.025320972 | NM_00392MBD3      | Promoter  |
| chr12:11692146-11692915  | 0.028594 | 1.025563244 | NM_00198ETV6      | Promoter  |
| chr4:8973624-8974282     | 0.033301 | 1.027959044 | NM_00110USP17     | Promoter  |
| chrX:89060348-89062228   | 0.020924 | 1.02886392  | NM_13896TGIF2LX   | Promoter  |
| chr15:53667762-53668060  | 0.04162  | 1.029338431 | NM_01561PYGO1     | Promoter  |
| chr14:59786313-59786471  | 0.008211 | 1.032060304 | NM_02100PPM1A     | Promoter  |
| chr14:59786313-59786471  | 0.008211 | 1.032060304 | NM_17795PPM1A     | Promoter  |
| chr8:346643-346787       | 0.008279 | 1.032068951 | NM_01217FBXO25    | Promoter  |
| chr8:346643-346787       | 0.008279 | 1.032068951 | NM_18342FBXO25    | Promoter  |
| chr8:346643-346787       | 0.008279 | 1.032068951 | NM_18342FBXO25    | Promoter  |
| chr4:8954643-8955301     | 0.044381 | 1.033944578 | NM_00110USP17     | Promoter  |
| chr13:19700918-19701380  | 0.018366 | 1.036283236 | NM_00678GJB6      | Promoter  |
| chr17:77783997-77784207  | 0.032922 | 1.03783741  | NM_00104SLC16A3   | Promoter  |
| chr9:34169189-34169349   | 0.02849  | 1.039257541 | NM_01652UBAP1     | Promoter  |

|                           |          |             |          |           |          |
|---------------------------|----------|-------------|----------|-----------|----------|
| chrX:127011605-127012962  | 0.008903 | 1.04006315  | NM_13828 | ACTRT1    | Promoter |
| chr19:5821001-5821851     | 0.037016 | 1.040702915 | NM_00203 | FUT5      | Promoter |
| chr1:157407849-157408027  | 0.045561 | 1.041592007 | NM_00112 | CADM3     | Promoter |
| chr1:157407849-157408027  | 0.045561 | 1.041592007 | NM_02118 | CADM3     | Promoter |
| chr13:94163686-94163912   | 0.01978  | 1.045685292 | NM_00708 | SOX21     | Promoter |
| chr8:61753846-61754030    | 0.038587 | 1.046098998 | NM_01778 | CHD7      | Promoter |
| chr12:103055971-103056260 | 0.045115 | 1.048450495 | NM_00616 | NFYB      | Promoter |
| chr21:37300741-37300905   | 0.006884 | 1.050611655 | NM_01896 | DSCR6     | Promoter |
| chr2:148318588-148318752  | 0.038097 | 1.050781882 | NM_00161 | ACVR2A    | Promoter |
| chr5:130627878-130628154  | 0.004898 | 1.050896884 | NM_00103 | CDC42SE2  | Promoter |
| chr5:130627878-130628154  | 0.004898 | 1.050896884 | NM_02024 | CDC42SE2  | Promoter |
| chr4:8940406-8941064      | 0.034195 | 1.052516815 | NM_00110 | USP17     | Promoter |
| chr7:733019-733260        | 0.005764 | 1.052650024 | NM_01780 | HEATR2    | Promoter |
| chr16:65518902-65519496   | 0.032604 | 1.057074311 | NM_00112 | RRAD      | Promoter |
| chr16:65518902-65519496   | 0.032604 | 1.057074311 | NM_00416 | RRAD      | Promoter |
| chr1:104000072-104001707  | 0.017663 | 1.057363941 | NM_00100 | AMY1B     | Promoter |
| chr1:104000072-104001707  | 0.017663 | 1.057363941 | NM_00100 | AMY1C     | Promoter |
| chr1:104000072-104001707  | 0.017663 | 1.057363941 | NM_00100 | AMY1A     | Promoter |
| chr1:104000072-104001707  | 0.017663 | 1.057363941 | NM_00403 | AMY1A     | Promoter |
| chr16:154984-155165       | 0.01495  | 1.061560501 | NM_00100 | HBM       | Promoter |
| chr5:178417964-178419728  | 0.011764 | 1.063851331 | NM_01459 | ZNF354C   | Promoter |
| chr1:159819605-159821300  | 0.049046 | 1.064924174 | NM_00100 | FCGR2C    | Promoter |
| chr1:159819605-159821300  | 0.049046 | 1.064924174 | NM_00100 | FCGR2C    | Promoter |
| chr1:159819605-159821300  | 0.049046 | 1.064924174 | NM_20156 | FCGR2C    | Promoter |
| chr21:30687186-30688317   | 0.036125 | 1.064947731 | NM_18159 | KRTAP13-1 | Promoter |
| chr1:104094210-104095846  | 0.022242 | 1.068594327 | NM_00100 | AMY1B     | Promoter |
| chr1:104094210-104095846  | 0.022242 | 1.068594327 | NM_00100 | AMY1C     | Promoter |
| chr1:104094210-104095846  | 0.022242 | 1.068594327 | NM_00100 | AMY1A     | Promoter |
| chr1:104094210-104095846  | 0.022242 | 1.068594327 | NM_00403 | AMY1A     | Promoter |
| chr10:131652697-131653057 | 0.045387 | 1.07230566  | NM_00100 | EBF3      | Promoter |
| chr17:57909764-57909927   | 0.017985 | 1.072874705 | NM_00111 | TLK2      | Promoter |
| chr17:57909764-57909927   | 0.017985 | 1.072874705 | NM_00685 | TLK2      | Promoter |
| chr9:130491879-130492133  | 0.026353 | 1.073409506 | NM_00301 | SET       | Promoter |
| chr13:75010332-75010973   | 0.022143 | 1.075242171 | NM_20349 | COMMD6    | Promoter |
| chr13:75010332-75010973   | 0.022143 | 1.075242171 | NM_20349 | COMMD6    | Promoter |
| chr11:3777066-3778473     | 0.009909 | 1.076116883 | NM_00538 | NUP98     | Promoter |
| chr11:3777066-3778473     | 0.009909 | 1.076116883 | NM_01632 | NUP98     | Promoter |
| chr11:3777066-3778473     | 0.009909 | 1.076116883 | NM_13913 | NUP98     | Promoter |
| chr11:3777066-3778473     | 0.009909 | 1.076116883 | NM_13913 | NUP98     | Promoter |
| chr3:161650893-161651854  | 0.020822 | 1.076996142 | NM_17308 | TRIM59    | Promoter |
| chr19:45727998-45728233   | 0.034355 | 1.078324861 | NM_02521 | SPTBN4    | Promoter |
| chr1:34403977-34404118    | 0.043472 | 1.078614953 | NM_03288 | C1orf94   | Promoter |
| chr1:34403977-34404118    | 0.043472 | 1.078614953 | NM_05289 | CSMD2     | Promoter |
| chr21:31041328-31043224   | 0.011605 | 1.079605939 | NM_18161 | KRTAP21-2 | Promoter |
| chr10:35144463-35144708   | 0.010517 | 1.080940574 | NM_01961 | PARD3     | Promoter |
| chr9:33807113-33807308    | 0.029349 | 1.081492338 | NM_01781 | UBE2R2    | Promoter |
| chrX:54226311-54226571    | 0.021964 | 1.083445107 | NM_01784 | FAM120C   | Promoter |

|                           |          |             |          |          |          |
|---------------------------|----------|-------------|----------|----------|----------|
| chr12:52688993-52689137   | 0.031639 | 1.08401546  | NM_02265 | HOXC8    | Promoter |
| chr13:56613852-56614685   | 0.048252 | 1.086236027 | NM_19844 | FLJ40296 | Promoter |
| chr4:8949898-8950556      | 0.03627  | 1.087416656 | NM_00110 | USP17    | Promoter |
| chr5:121214906-121215380  | 0.045872 | 1.088499333 | NM_17747 | FTMT     | Promoter |
| chr6:30188621-30188946    | 0.029176 | 1.092067919 | NM_00702 | TRIM31   | Promoter |
| chr3:189411926-189412206  | 0.01949  | 1.092195302 | NM_00557 | LPP      | Promoter |
| chr10:104145524-104145669 | 0.029269 | 1.101938486 | NM_00107 | NFKB2    | Promoter |
| chr10:104145524-104145669 | 0.029269 | 1.101938486 | NM_00107 | NFKB2    | Promoter |
| chr10:104145524-104145669 | 0.029269 | 1.101938486 | NM_00250 | NFKB2    | Promoter |
| chr2:233960453-233960929  | 0.025542 | 1.105924997 | NM_00364 | DGKD     | Promoter |
| chr10:85989877-85991042   | 0.049291 | 1.108131802 | NM_01561 | LRIT1    | Promoter |
| chr11:5099598-5100266     | 0.043504 | 1.108762428 | NM_00100 | OR52A4   | Promoter |
| chr22:40527275-40528585   | 0.002911 | 1.109638434 | NM_02482 | CCDC134  | Promoter |
| chr2:233961582-233962426  | 0.004239 | 1.111441958 | NM_00364 | DGKD     | Promoter |
| chr1:46369564-46369636    | 0.015684 | 1.116175601 | NM_00111 | PIK3R3   | Promoter |
| chr1:46369564-46369636    | 0.015684 | 1.116175601 | NM_00362 | PIK3R3   | Promoter |
| chr22:45312726-45312781   | 0.006711 | 1.1249913   | NM_01424 | CELSR1   | Promoter |
| chr10:118369768-118370385 | 0.035193 | 1.125329213 | NM_00535 | PNLIPRP2 | Promoter |
| chr18:28605667-28605892   | 0.025917 | 1.126948123 | NM_02080 | KLHL14   | Promoter |
| chr9:106369016-106370584  | 0.009525 | 1.129359381 | NM_00100 | OR13C8   | Promoter |
| chr4:8959388-8960046      | 0.023252 | 1.130607153 | NM_00110 | USP17    | Promoter |
| chr12:112344252-112344301 | 0.005691 | 1.130930222 | NM_13843 | SDSL     | Promoter |
| chr2:216587473-216587909  | 0.01265  | 1.132241603 | NM_01800 | MREG     | Promoter |
| chr1:159783243-159784856  | 0.009274 | 1.133644437 | NM_00050 | FCGR3A   | Promoter |
| chr1:159783243-159784856  | 0.009274 | 1.133644437 | NM_00112 | FCGR3A   | Promoter |
| chr1:159901409-159903104  | 0.026473 | 1.13411726  | NM_00100 | FCGR2B   | Promoter |
| chr1:159901409-159903104  | 0.026473 | 1.13411726  | NM_00100 | FCGR2B   | Promoter |
| chr1:159901409-159903104  | 0.026473 | 1.13411726  | NM_00100 | FCGR2B   | Promoter |
| chr1:159901409-159903104  | 0.026473 | 1.13411726  | NM_00400 | FCGR2B   | Promoter |
| chr15:97008806-97008950   | 0.007932 | 1.135099901 | NM_00087 | IGF1R    | Promoter |
| chr13:31898134-31899060   | 0.026504 | 1.136532395 | NM_00107 | N4BP2L1  | Promoter |
| chr13:31898134-31899060   | 0.026504 | 1.136532395 | NM_05281 | N4BP2L1  | Promoter |
| chr11:1676987-1677384     | 0.04645  | 1.137551554 | NM_00101 | KRTAP5-6 | Promoter |
| chr7:29200298-29200403    | 0.00263  | 1.142721643 | NM_00400 | CHN2     | Promoter |
| chr4:8935660-8936318      | 0.024398 | 1.144042543 | NM_00110 | USP17    | Promoter |
| chr4:122519179-122520726  | 0.023973 | 1.145189562 | NM_19817 | GPR103   | Promoter |
| chr9:109291878-109292069  | 0.032923 | 1.145961815 | NM_00423 | KLF4     | Promoter |
| chr7:149652854-149653278  | 0.025064 | 1.146173207 | NM_02394 | LRRRC61  | Promoter |
| chr5:113797518-113798174  | 0.017206 | 1.148474146 | NM_17077 | KCNN2    | Promoter |
| chr13:28497896-28498967   | 0.045119 | 1.150465947 | NM_00103 | KIAA0774 | Promoter |
| chr9:139565839-139566019  | 0.011684 | 1.152375818 | NM_00100 | PNPLA7   | Promoter |
| chr9:139565839-139566019  | 0.011684 | 1.152375818 | NM_03247 | MRPL41   | Promoter |
| chr9:139565839-139566019  | 0.011684 | 1.152375818 | NM_15228 | PNPLA7   | Promoter |
| chr15:81667549-81667688   | 0.017506 | 1.153520163 | NM_01607 | HDGFRP3  | Promoter |
| chr19:40930988-40931037   | 0.007086 | 1.157726844 | NM_01910 | LIN37    | Promoter |
| chr3:11242721-11242879    | 0.027241 | 1.159003678 | NM_00100 | HRH1     | Promoter |
| chr1:109458459-109459633  | 0.006379 | 1.162284866 | NM_00112 | C1orf194 | Promoter |

|                           |          |             |          |          |          |
|---------------------------|----------|-------------|----------|----------|----------|
| chr1:109458459-109459633  | 0.006379 | 1.162284866 | NM_02077 | KIAA1324 | Promoter |
| chr1:155130004-155130092  | 0.020088 | 1.165339247 | NM_00108 | PEAR1    | Promoter |
| chr10:118755991-118756670 | 0.011469 | 1.17331621  | NM_00112 | KIAA1598 | Promoter |
| chr10:118755991-118756670 | 0.011469 | 1.17331621  | NM_01833 | KIAA1598 | Promoter |
| chr21:46093671-46095577   | 0.006579 | 1.17407871  | NM_02052 | PCBP3    | Promoter |
| chr3:67130982-67131038    | 0.00556  | 1.178517394 | NM_03250 | KBTBD8   | Promoter |
| chr7:68701161-68701402    | 0.021419 | 1.178724634 | NM_00112 | AUTS2    | Promoter |
| chr7:68701161-68701402    | 0.021419 | 1.178724634 | NM_00112 | AUTS2    | Promoter |
| chr7:68701161-68701402    | 0.021419 | 1.178724634 | NM_01557 | AUTS2    | Promoter |
| chr17:40580572-40580702   | 0.004619 | 1.178913868 | NM_00646 | HEXIM1   | Promoter |
| chr6:31623505-31623596    | 0.00778  | 1.179343547 | NM_00500 | NFKBIL1  | Promoter |
| chr6:31623505-31623596    | 0.00778  | 1.179343547 | NM_13046 | ATP6V1G2 | Promoter |
| chr6:31623505-31623596    | 0.00778  | 1.179343547 | NM_13828 | ATP6V1G2 | Promoter |
| chr11:128752923-128754629 | 0.022135 | 1.179797296 | NM_00365 | BARX2    | Promoter |
| chr1:55279421-55280299    | 0.033658 | 1.180606533 | NM_17493 | PCSK9    | Promoter |
| chr15:63690999-63691060   | 0.006598 | 1.184860645 | NM_03080 | C15orf44 | Promoter |
| chr17:31616331-31617220   | 0.033078 | 1.187793666 | NM_00100 | TBC1D3C  | Promoter |
| chr5:121213919-121214717  | 0.023191 | 1.196101297 | NM_17747 | FTMT     | Promoter |
| chr8:37672607-37672734    | 0.011257 | 1.19713745  | NM_02506 | ZNF703   | Promoter |
| chr22:23664984-23665033   | 0.000888 | 1.199002627 | NM_00100 | TMEM211  | Promoter |
| chr6:144040660-144040819  | 0.006982 | 1.200314504 | NM_00110 | PHACTR2  | Promoter |
| chr6:144040660-144040819  | 0.006982 | 1.200314504 | NM_00110 | PHACTR2  | Promoter |
| chr2:231499945-231501047  | 0.029815 | 1.200818768 | NM_00568 | GPR55    | Promoter |
| chr20:60074096-60074369   | 0.003663 | 1.201180056 | NM_00318 | TAF4     | Promoter |
| chr19:56338560-56339505   | 0.02813  | 1.203341343 | NM_01438 | SIGLEC7  | Promoter |
| chr19:56338560-56339505   | 0.02813  | 1.203341343 | NM_01654 | SIGLEC7  | Promoter |
| chr7:44331694-44331882    | 0.003572 | 1.204006177 | NM_00122 | CAMK2B   | Promoter |
| chr7:44331694-44331882    | 0.003572 | 1.204006177 | NM_17207 | CAMK2B   | Promoter |
| chr7:44331694-44331882    | 0.003572 | 1.204006177 | NM_17207 | CAMK2B   | Promoter |
| chr7:44331694-44331882    | 0.003572 | 1.204006177 | NM_17208 | CAMK2B   | Promoter |
| chr7:44331694-44331882    | 0.003572 | 1.204006177 | NM_17208 | CAMK2B   | Promoter |
| chr7:44331694-44331882    | 0.003572 | 1.204006177 | NM_17208 | CAMK2B   | Promoter |
| chr7:44331694-44331882    | 0.003572 | 1.204006177 | NM_17208 | CAMK2B   | Promoter |
| chr7:44331694-44331882    | 0.003572 | 1.204006177 | NM_17208 | CAMK2B   | Promoter |
| chr17:78267802-78267891   | 0.003633 | 1.206457127 | NM_02461 | FN3KRP   | Promoter |
| chr14:95222542-95223737   | 0.013826 | 1.207702575 | NM_00491 | TCL1B    | Promoter |
| chr14:95222542-95223737   | 0.013826 | 1.207702575 | NM_19920 | TCL1B    | Promoter |
| chr1:46436698-46436877    | 0.008689 | 1.209984843 | NM_01773 | POMGNT1  | Promoter |
| chr12:28014472-28014633   | 0.006952 | 1.215777829 | NM_00282 | PTHLH    | Promoter |
| chr12:28014472-28014633   | 0.006952 | 1.215777829 | NM_19896 | PTHLH    | Promoter |
| chr12:28014472-28014633   | 0.006952 | 1.215777829 | NM_19896 | PTHLH    | Promoter |
| chr12:28014472-28014633   | 0.006952 | 1.215777829 | NM_19896 | PTHLH    | Promoter |
| chr6:111244778-111245428  | 0.020922 | 1.218551899 | NM_01507 | CDC2L6   | Promoter |
| chr1:104001708-104002783  | 0.023927 | 1.219756305 | NM_00100 | AMY1B    | Promoter |
| chr1:104001708-104002783  | 0.023927 | 1.219756305 | NM_00100 | AMY1C    | Promoter |
| chr1:104001708-104002783  | 0.023927 | 1.219756305 | NM_00403 | AMY1A    | Promoter |
| chr15:88345916-88346060   | 0.016301 | 1.223408027 | NM_19852 | ZNF710   | Promoter |

|                           |          |             |          |          |          |
|---------------------------|----------|-------------|----------|----------|----------|
| chr14:20045975-20047207   | 0.009429 | 1.224076024 | NM_00101 | RNASE10  | Promoter |
| chr1:153515538-153516453  | 0.003532 | 1.233548014 | NM_02089 | HCN3     | Promoter |
| chr19:59260155-59260673   | 0.02094  | 1.238895235 | NM_19848 | VSTM1    | Promoter |
| chr4:25264112-25264841    | 0.012989 | 1.23978259  | NM_00642 | SLC34A2  | Promoter |
| chr1:109827669-109828248  | 0.015458 | 1.239836009 | NM_15332 | ATXN7L2  | Promoter |
| chr12:99492358-99493482   | 0.032173 | 1.241197172 | NM_17492 | GAS2L3   | Promoter |
| chr3:51976604-51976771    | 0.00257  | 1.24217524  | NM_03300 | PCBP4    | Promoter |
| chr20:1821958-1822178     | 0.035675 | 1.243513568 | NM_00102 | SIRPA    | Promoter |
| chr20:1821958-1822178     | 0.035675 | 1.243513568 | NM_00102 | SIRPA    | Promoter |
| chr20:1821958-1822178     | 0.035675 | 1.243513568 | NM_08079 | SIRPA    | Promoter |
| chr17:33423525-33424108   | 0.039339 | 1.246138451 | NM_00112 | TBC1D3E  | Promoter |
| chr3:12018606-12019410    | 0.016498 | 1.249245615 | NM_00317 | SYN2     | Promoter |
| chr3:12018606-12019410    | 0.016498 | 1.249245615 | NM_13362 | SYN2     | Promoter |
| chr5:14924542-14924805    | 0.011717 | 1.252908233 | NM_05402 | ANKH     | Promoter |
| chr9:35664000-35664079    | 0.0124   | 1.254274044 | NM_00121 | CA9      | Promoter |
| chr12:111331854-111331918 | 0.001255 | 1.258805065 | NM_00097 | RPL6     | Promoter |
| chr12:111331854-111331918 | 0.001255 | 1.258805065 | NM_00102 | RPL6     | Promoter |
| chr12:55768886-55769003   | 0.005378 | 1.261213112 | NM_00596 | NAB2     | Promoter |
| chr19:42551771-42553064   | 0.010519 | 1.265011712 | NM_03245 | ZNF527   | Promoter |
| chr5:34079557-34079820    | 0.025419 | 1.265084339 | NM_03092 | C1QTNF3  | Promoter |
| chr5:34079557-34079820    | 0.025419 | 1.265084339 | NM_18143 | C1QTNF3  | Promoter |
| chr2:104838590-104838858  | 0.003378 | 1.266310326 | NM_00623 | POU3F3   | Promoter |
| chr19:35125032-35125227   | 0.010935 | 1.276046392 | NM_00379 | C19orf2  | Promoter |
| chr19:35125032-35125227   | 0.010935 | 1.276046392 | NM_13442 | C19orf2  | Promoter |
| chr3:46996350-46996546    | 0.004531 | 1.281072709 | NM_01517 | NBEAL2   | Promoter |
| chr9:124742996-124743148  | 0.022981 | 1.285601146 | NM_01219 | RABGAP1  | Promoter |
| chr17:33357268-33357851   | 0.027308 | 1.285820904 | NM_00112 | TBC1D3F  | Promoter |
| chr17:33357268-33357851   | 0.027308 | 1.285820904 | NM_00112 | TBC1D3E  | Promoter |
| chr17:33357268-33357851   | 0.027308 | 1.285820904 | NM_03225 | TBC1D3   | Promoter |
| chr20:21325746-21325928   | 0.007912 | 1.285950913 | NM_03317 | NKX2-4   | Promoter |
| chr1:245649644-245650359  | 0.016681 | 1.291921831 | NM_00112 | NLRP3    | Promoter |
| chr1:245649644-245650359  | 0.016681 | 1.291921831 | NM_00489 | NLRP3    | Promoter |
| chr1:245649644-245650359  | 0.016681 | 1.291921831 | NM_18339 | NLRP3    | Promoter |
| chr1:64440142-64441087    | 0.002455 | 1.297560604 | NM_15248 | UBE2U    | Promoter |
| chr1:28459164-28459403    | 0.006367 | 1.299913591 | NM_03145 | SESN2    | Promoter |
| chr11:75055366-75056094   | 0.007814 | 1.303392029 | NM_03306 | MAP6     | Promoter |
| chr11:75055366-75056094   | 0.007814 | 1.303392029 | NM_20757 | MAP6     | Promoter |
| chr12:105165347-105165645 | 0.000755 | 1.305386379 | NM_00682 | CKAP4    | Promoter |
| chr17:75775678-75775881   | 0.006303 | 1.318375605 | NM_05281 | CARD14   | Promoter |
| chr17:9881046-9881898     | 0.008065 | 1.319819115 | NM_20143 | GAS7     | Promoter |
| chr1:49015158-49015383    | 0.009848 | 1.321252913 | NM_02460 | C1orf165 | Promoter |
| chr17:37329738-37330293   | 0.013498 | 1.321706566 | NM_00109 | ACLY     | Promoter |
| chr17:37329738-37330293   | 0.013498 | 1.321706566 | NM_19883 | ACLY     | Promoter |
| chr17:31528287-31529176   | 0.02903  | 1.338041759 | NM_00100 | TBC1D3B  | Promoter |
| chr2:26767615-26768077    | 0.027156 | 1.339875781 | NM_00222 | KCNK3    | Promoter |
| chr17:31109748-31110756   | 0.003698 | 1.347490847 | NM_14527 | C17orf50 | Promoter |
| chr2:179455199-179456447  | 0.006305 | 1.350316888 | NM_17362 | CCDC141  | Promoter |



|                           |          |             |          |          |          |
|---------------------------|----------|-------------|----------|----------|----------|
| chr19:19357730-19357890   | 0.001148 | 1.350767515 | NM_01766 | GATAD2A  | Promoter |
| chr3:102880186-102880898  | 0.002086 | 1.364134537 | NM_01441 | ZBTB11   | Promoter |
| chr8:9044347-9045276      | 0.020822 | 1.374384571 | NM_02460 | PPP1R3B  | Promoter |
| chr2:85409223-85409320    | 0.000221 | 1.380712027 | NM_00646 | TGOLN2   | Promoter |
| chr10:123347834-123348070 | 0.002758 | 1.382689405 | NM_00014 | FGFR2    | Promoter |
| chr10:123347834-123348070 | 0.002758 | 1.382689405 | NM_02297 | FGFR2    | Promoter |
| chr1:10994912-10995026    | 0.000286 | 1.382900298 | NM_00737 | TARDBP   | Promoter |
| chr17:33602944-33603527   | 0.021592 | 1.383835049 | NM_00112 | TBC1D3F  | Promoter |
| chr17:33602944-33603527   | 0.021592 | 1.383835049 | NM_00112 | TBC1D3E  | Promoter |
| chr17:33602944-33603527   | 0.021592 | 1.383835049 | NM_03225 | TBC1D3   | Promoter |
| chr1:104037475-104038550  | 0.019007 | 1.385502622 | NM_00100 | AMY1B    | Promoter |
| chr1:104037475-104038550  | 0.019007 | 1.385502622 | NM_00100 | AMY1C    | Promoter |
| chr1:104037475-104038550  | 0.019007 | 1.385502622 | NM_00403 | AMY1A    | Promoter |
| chr3:150424141-150424697  | 0.046519 | 1.393861056 | NM_00009 | CP       | Promoter |
| chr1:104095847-104096922  | 0.010736 | 1.404102458 | NM_00100 | AMY1B    | Promoter |
| chr1:104095847-104096922  | 0.010736 | 1.404102458 | NM_00100 | AMY1C    | Promoter |
| chr1:104095847-104096922  | 0.010736 | 1.404102458 | NM_00403 | AMY1A    | Promoter |
| chr2:177964977-177965511  | 0.010243 | 1.405531401 | NM_00365 | AGPS     | Promoter |
| chr7:100609052-100609179  | 0.003608 | 1.414010625 | NM_19857 | C7orf52  | Promoter |
| chr7:30033097-30033147    | 0.002494 | 1.417104672 | NM_01794 | FKBP14   | Promoter |
| chr7:30033097-30033147    | 0.002494 | 1.417104672 | NM_03263 | PLEKHA8  | Promoter |
| chr6:107064200-107064925  | 0.004909 | 1.434049372 | NM_00162 | AIM1     | Promoter |
| chr10:14855540-14855900   | 0.009879 | 1.434419154 | NM_03145 | FAM107B  | Promoter |
| chr17:31882395-31883284   | 0.02702  | 1.436447451 | NM_00100 | TBC1D3C  | Promoter |
| chr17:31882395-31883284   | 0.02702  | 1.436447451 | NM_00104 | TBC1D3G  | Promoter |
| chr9:2611969-2612246      | 0.001935 | 1.442891329 | NM_00101 | VLDLR    | Promoter |
| chr9:2611969-2612246      | 0.001935 | 1.442891329 | NM_00338 | VLDLR    | Promoter |
| chr7:26297901-26298187    | 0.003579 | 1.44387607  | NM_01332 | SNX10    | Promoter |
| chr1:156056984-156058709  | 0.005354 | 1.444484517 | NM_05293 | FCRL1    | Promoter |
| chr13:109236896-109237128 | 0.002197 | 1.461648484 | NM_00374 | IRS2     | Promoter |
| chr9:103397306-103397668  | 0.008458 | 1.495259692 | NM_14718 | PPP3R2   | Promoter |
| chr16:69277364-69277629   | 0.000626 | 1.502057759 | NM_13838 | ABBA-1   | Promoter |
| chr6:149928103-149928161  | 0.000395 | 1.53212086  | NM_13878 | C6orf72  | Promoter |
| chr15:50869739-50869963   | 0.000478 | 1.539273352 | NM_00449 | ONECUT1  | Promoter |
| chr5:666641-667770        | 0.003624 | 1.559079933 | NM_01814 | CEP72    | Promoter |
| chrX:153534142-153534305  | 0.014091 | 1.611917456 | NM_02099 | CTAG2    | Promoter |
| chrX:153534142-153534305  | 0.014091 | 1.611917456 | NM_17237 | CTAG2    | Promoter |
| chr6:167442713-167443474  | 0.001804 | 1.614855472 | NM_00436 | CCR6     | Promoter |
| chr10:77212264-77212319   | 0.000255 | 1.643486936 | NM_03202 | C10orf11 | Promoter |
| chr1:42619968-42620535    | 0.011984 | 1.647551936 | NM_17364 | FAM80A   | Promoter |
| chr13:56617444-56617843   | 0.001382 | 1.669800115 | NM_19844 | FLJ40296 | Promoter |
| chr18:75968032-75968356   | 0.001248 | 1.676860964 | NM_01491 | ADNP2    | Promoter |
| chr16:82491682-82492694   | 0.0027   | 1.681072121 | NM_01221 | MLYCD    | Promoter |
| chr1:165457193-165457246  | 0.000105 | 1.687296425 | NM_00269 | POU2F1   | Promoter |
| chr2:29150101-29151342    | 0.008092 | 1.694863665 | NM_00102 | FLJ34931 | Promoter |
| chr10:14856539-14856952   | 0.011495 | 1.702557952 | NM_03145 | FAM107B  | Promoter |
| chr9:126573858-126573918  | 0.00029  | 1.702911089 | NM_00148 | NR6A1    | Promoter |

|                           |          |             |                   |          |
|---------------------------|----------|-------------|-------------------|----------|
| chr9:126573858-126573918  | 0.00029  | 1.702911089 | NM_03333 NR6A1    | Promoter |
| chr7:28693680-28694790    | 0.000625 | 1.71541171  | NM_00101 CREB5    | Promoter |
| chr13:56637158-56637557   | 0.000676 | 1.758897988 | NM_19844 FLJ40296 | Promoter |
| chr1:176961858-176961913  | 0.000123 | 1.787031666 | NM_01803 RALGPS2  | Promoter |
| chr1:176961858-176961913  | 0.000123 | 1.787031666 | NM_15266 RALGPS2  | Promoter |
| chr8:19718609-19718665    | 0.000119 | 1.814374392 | NM_01814 INTS10   | Promoter |
| chr20:43603433-43604705   | 0.001977 | 1.821011399 | NM_08082 WFDC6    | Promoter |
| chr10:14854943-14855539   | 0.000671 | 1.826318685 | NM_03145 FAM107B  | Promoter |
| chr1:43199249-43200039    | 0.004758 | 1.828748425 | NM_00651 SLC2A1   | Promoter |
| chr13:56630587-56630986   | 0.000457 | 1.833115769 | NM_19844 FLJ40296 | Promoter |
| chr10:14854696-14854942   | 0.002101 | 1.850865473 | NM_03145 FAM107B  | Promoter |
| chr12:24605867-24605918   | 2.76E-06 | 1.855442686 | NM_15298 SOX5     | Promoter |
| chr14:96038675-96038724   | 6.12E-06 | 1.882536247 | NM_03263 PAPOLA   | Promoter |
| chr3:117648656-117649307  | 0.000465 | 1.886373174 | NM_00233 LSAMP    | Promoter |
| chr2:113479254-113480227  | 0.00258  | 1.918563846 | NM_01444 IL1F6    | Promoter |
| chr13:56624014-56624413   | 0.000242 | 1.92209704  | NM_19844 FLJ40296 | Promoter |
| chr14:33487056-33488359   | 0.001919 | 1.923364903 | NM_02207 EGLN3    | Promoter |
| chr16:83241423-83242276   | 0.001451 | 2.019638512 | NM_02473 C16orf44 | Promoter |
| chr6:111409755-111409807  | 8.88E-07 | 2.212714734 | NM_03219 BXDC1    | Promoter |
| chr10:112622465-112622524 | 2.86E-08 | 2.388991851 | NM_01445 PDCD4    | Promoter |
| chr10:112622465-112622524 | 2.86E-08 | 2.388991851 | NM_14534 PDCD4    | Promoter |
| chr11:10518922-10518973   | 1.08E-07 | 2.416263288 | NM_01642 RNF141   | Promoter |
| chr16:46975878-46975928   | 1.04E-06 | 2.423465204 | NM_00303 SIAH1    | Promoter |
| chr17:59931958-59932008   | 2.41E-06 | 2.436157913 | NM_00435 DDX5     | Promoter |
| chr17:59931958-59932008   | 2.41E-06 | 2.436157913 | NM_13836 CCDC45   | Promoter |
| chr11:117735854-117735906 | 2.43E-09 | 2.520295005 | NM_00478 UBE4A    | Promoter |
| chr10:14857333-14858743   | 0.000174 | 2.557173133 | NM_03145 FAM107B  | Promoter |
| chr10:14856953-14857321   | 5.49E-05 | 3.50781445  | NM_03145 FAM107B  | Promoter |

---
