# Supplementary material
Source: PubMed Central journal article supplement (PMC5247657)
Supplement: 10.1074_M116.745208_jbc.M116.745208-5.pdf [file 10.1074_M116.745208_jbc.M116.745208-5.pdf]

Supp Table 3: Common underexpressed genes in murine NOTCH transgenic and human CCRCC

| Human gene | Gene description                                                                                            | probe ID    | log2 FC in RCC | p-value     | FDR      | Mous e gene | log2 FC in Notch | p-value     | FDR        |
|------------|-------------------------------------------------------------------------------------------------------------|-------------|----------------|-------------|----------|-------------|------------------|-------------|------------|
| CALB1      | calbindin 1, 28kDa                                                                                          | 205626_s_at | -7.327139282   | 1.21273E-10 | 1.84E-08 | Calb1       | -4.154902175     | 0.000396994 | 0.00990886 |
| ALDOB      | aldolase B, fructose-bisphosphate                                                                           | 204704_s_at | -6.724713476   | 2.64443E-14 | 2.36E-12 | Aldob       | -2.523562246     | 0.000739153 | 0.01299297 |
| DIO1       | deiodinase, iodothyronine, type I                                                                           | 206457_s_at | -6.673181437   | 1.0697E-13  | 1.08E-10 | Dio1        | -2.167407676     | 5.34096E-05 | 0.00504473 |
| NPHS2      | nephrosis 2, idiopathic, steroid-resistant (podocin)                                                        | 220424_at   | -6.634518174   | 1.07258E-06 | 1.47E-05 | Nphs2       | -2.362921172     | 4.65072E-06 | 0.0037192  |
| CALB1      | calbindin 1, 28kDa                                                                                          | 205625_s_at | -6.192214591   | 1.65451E-09 | 1.31E-07 | Calb1       | -4.154902175     | 0.000396994 | 0.00990886 |
| ALDOB      | Aldolase B, fructose-bisphosphate                                                                           | 214424_s_at | -5.828761804   | 2.4311E-06  | 2.68E-05 | Aldob       | -2.523562246     | 0.000739153 | 0.01299297 |
| HPD        | 4-hydroxyphenylpyruvate dioxygenase                                                                         | 206024_at   | -5.817646483   | 1.14565E-07 | 2.89E-06 | Hpd         | -3.237879771     | 0.003954113 | 0.0330476  |
| SLC12A1    | solute carrier family 12 (sodium/potassium/chloride transporters), member 1                                 | 220281_at   | -5.529017201   | 1.45568E-08 | 2.81E-07 | Slc12a1     | -2.714956038     | 0.000295024 | 0.0088131  |
| ALDOB      | aldolase B, fructose-bisphosphate                                                                           | 217238_s_at | -5.312656416   | 8.84786E-07 | 5.99E-06 | Aldob       | -2.523562246     | 0.000739153 | 0.01299297 |
| ALDOB      | aldolase B, fructose-bisphosphate                                                                           | 211357_s_at | -5.272954381   | 1.58889E-06 | 1.24E-05 | Aldob       | -2.523562246     | 0.000739153 | 0.01299297 |
| SLC13A3    | solute carrier family 13 (sodium-dependent dicarboxylate transporter), member 3                             | 205244_s_at | -5.121525821   | 4.30792E-10 | 5.82E-08 | Slc13a3     | -4.789157929     | 0.000387269 | 0.00979781 |
| ALDOB      | aldolase B, fructose-bisphosphate                                                                           | 204705_x_at | -5.104182235   | 1.07516E-06 | 5.81E-06 | Aldob       | -2.523562246     | 0.000739153 | 0.01299297 |
| KCNJ1      | potassium inwardly-rectifying channel, subfamily J, member 1                                                | 210402_at   | -5.065607215   | 1.13789E-08 | 5.92E-07 | Kcnj1       | -1.012408513     | 0.004065203 | 0.03355651 |
| SLC7A8     | solute carrier family 7 (amino acid transporter, L-type),                                                   | 216604_s_at | -4.719179147   | 2.62145E-06 | 2.73E-05 | Slc7a8      | -2.559691378     | 6.33995E-05 | 0.00520985 |
| PAH        | phenylalanine hydroxylase                                                                                   | 205719_s_at | -4.665204128   | 4.6369E-06  | 2.06E-05 | Pah         | -6.607867512     | 0.000101334 | 0.00594537 |
| SLC13A3    | solute carrier family 13 (sodium-dependent dicarboxylate transporter), member 3                             | 205243_at   | -4.545081674   | 2.36466E-09 | 1.91E-07 | Slc13a3     | -4.789157929     | 0.000387269 | 0.00979781 |
| DPEP1      | dipeptidase 1 (renal)                                                                                       | 205983_at   | -4.540218444   | 1.48803E-08 | 6.29E-07 | Dpep1       | -3.737832966     | 6.1372E-05  | 0.00519049 |
| ALDOB      | Aldolase B, fructose-bisphosphate                                                                           | 214423_x_at | -4.443677914   | 1.07603E-07 | 2.57E-06 | Aldob       | -2.523562246     | 0.000739153 | 0.01299297 |
| ALDOB      | Aldolase B, fructose-bisphosphate                                                                           | 216600_x_at | -4.326058711   | 9.19769E-08 | 2.71E-06 | Aldob       | -2.523562246     | 0.000739153 | 0.01299297 |
| SFRP1      | secreted frizzled-related protein 1                                                                         | 202037_s_at | -4.307506495   | 9.56301E-09 | 4.81E-07 | Sfrp1       | -1.998849954     | 0.001719076 | 0.0204781  |
| ABAT       | 4-aminobutyrate aminotransferase                                                                            | 209459_s_at | -4.280004024   | 1.40539E-11 | 6.90E-10 | Abat        | -2.141716716     | 0.001326203 | 0.0177235  |
| G6PC       | glucose-6-phosphatase, catalytic subunit                                                                    | 206952_at   | -4.25441816    | 2.59167E-08 | 6.32E-07 | G6pc        | -4.970835115     | 0.00018673  | 0.00729651 |
| ABAT       | 4-aminobutyrate aminotransferase                                                                            | 209460_at   | -4.026082171   | 4.63645E-10 | 3.37E-08 | Abat        | -2.141716716     | 0.001326203 | 0.0177235  |
| SLC22A6    | solute carrier family 22 (organic anion transporter), member 6                                              | 210343_s_at | -3.734692175   | 4.27761E-07 | 3.29E-06 | Slc22a6     | -5.514613636     | 0.000215078 | 0.00776123 |
| SFRP1      | secreted frizzled-related protein 1                                                                         | 202036_s_at | -3.71608146    | 1.28973E-08 | 5.49E-07 | Sfrp1       | -1.998849954     | 0.001719076 | 0.0204781  |
| AFM        | afamin                                                                                                      | 206840_at   | -3.680195964   | 2.0458E-06  | 2.26E-05 | Afm         | -1.323073005     | 0.000205274 | 0.00762322 |
| SLC34A1    | solute carrier family 34 (sodium phosphate), member 1                                                       | 217530_at   | -3.657563907   | 4.93544E-09 | 3.29E-07 | Slc34a1     | -4.729474165     | 0.000684974 | 0.01251166 |
| SLC12A3    | solute carrier family 12 (sodium/chloride transporters),                                                    | 215274_at   | -3.591731681   | 2.12751E-06 | 2.51E-05 | Slc12a3     | -2.378798902     | 0.000804958 | 0.01346632 |
| ACY1       | aminoacylase 1                                                                                              | 202740_at   | -3.52996596    | 1.43706E-06 | 1.48E-05 | Acy1        | -3.810938171     | 0.000149341 | 0.00686204 |
| SLC7A8     | solute carrier family 7 (amino acid transporter, L-type),                                                   | 216603_at   | -3.50135712    | 8.80096E-06 | 6.72E-05 | Slc7a8      | -2.559691378     | 6.33995E-05 | 0.00520985 |
| SLC7A9     | solute carrier family 7 (cationic amino acid transporter, y+ system), member 9                              | 220135_s_at | -3.419087122   | 8.92704E-08 | 1.47E-06 | Slc7a9      | -2.032082405     | 0.000259005 | 0.00835159 |
| SLC34A1    | solute carrier family 34 (sodium phosphate), member 1                                                       | 208177_at   | -3.393586085   | 4.50617E-07 | 8.32E-06 | Slc34a1     | -4.729474165     | 0.000684974 | 0.01251166 |
| DAO        | D-amino-acid oxidase                                                                                        | 206878_at   | -3.229362754   | 8.23412E-08 | 2.67E-06 | Dao         | -1.312971282     | 0.005626652 | 0.0408125  |
| HAO2       | hydroxyacid oxidase 2 (long chain)                                                                          | 220801_s_at | -3.22088954    | 3.08403E-06 | 2.21E-05 | Hao2        | -4.190618591     | 0.000470409 | 0.01061291 |
| DNAJC12    | Dnaj (Hsp40) homolog, subfamily C, member 12                                                                | 218976_at   | -3.068937455   | 2.58011E-08 | 2.12E-06 | Dnajc12     | -3.774675046     | 0.000109936 | 0.00610446 |
| SLC4A1     | solute carrier family 4, anion exchanger, member 1 (erythrocyte membrane protein band 3, Diego blood group) | 205592_at   | -3.054903207   | 8.07268E-07 | 1.46E-05 | Slc4a1      | -2.052832415     | 9.89555E-06 | 0.00399921 |

|           |                                                                                        |             |              |             |                    |              |             |            |
|-----------|----------------------------------------------------------------------------------------|-------------|--------------|-------------|--------------------|--------------|-------------|------------|
| SLC7A7    | solute carrier family 7 (cationic amino acid transporter, y+ system), member 7         | 204588_s_at | -2.911156184 | 1.40019E-06 | 2.94E-05 Slc7a7    | -2.787936445 | 0.000489983 | 0.01084138 |
| RAB11FIP3 | RAB11 family interacting protein 3 (class II)                                          | 214999_s_at | -2.893617415 | 4.52678E-06 | 2.64E-05 Rab11fip3 | -1.365744513 | 0.001478867 | 0.0188713  |
| SLC22A8   | solute carrier family 22 (organic anion transporter), member                           | 221298_s_at | -2.890094577 | 0.00010526  | 0.000436 Slc22a8   | -5.408202582 | 1.66363E-05 | 0.00399921 |
| ASS1      | argininosuccinate synthase 1                                                           | 207076_s_at | -2.878108565 | 4.50673E-06 | 3.49E-05 Ass1      | -3.190494402 | 0.000182721 | 0.00726704 |
| PAH       | phenylalanine hydroxylase                                                              | 217583_at   | -2.873036819 | 1.9904E-06  | 2.28E-05 Pah       | -6.607867512 | 0.000101334 | 0.00594537 |
| GPD1      | glycerol-3-phosphate dehydrogenase 1 (soluble)                                         | 213706_at   | -2.846257652 | 9.09527E-08 | 1.62E-06 Gpd1      | -2.703401934 | 0.000195673 | 0.00747941 |
| GLYAT     | glycine-N-acyltransferase                                                              | 222083_at   | -2.793171359 | 5.26227E-07 | 6.32E-06 Glyat     | -2.775284127 | 5.55084E-05 | 0.00504473 |
| FBP1      | fructose-1,6-bisphosphatase 1                                                          | 209696_at   | -2.785920116 | 1.51302E-06 | 1.2E-05 Fbp1       | -3.683001593 | 0.001039426 | 0.01553997 |
| SLC22A6   | solute carrier family 22 (organic anion transporter), member                           | 216599_x_at | -2.764024385 | 5.49296E-06 | 3.82E-05 Slc22a6   | -5.514613636 | 0.000215078 | 0.00776123 |
| PTH1R     | parathyroid hormone 1 receptor                                                         | 205911_at   | -2.717437398 | 1.92027E-06 | 1.5E-05 Pth1r      | -3.189467848 | 0.001803538 | 0.02098794 |
| CHRD1     | chordin-like 1                                                                         | 209763_at   | -2.695817088 | 0.000746717 | 0.000973 Chrd1     | -1.551697526 | 0.002026811 | 0.02232253 |
| SLC7A8    | solute carrier family 7 (amino acid transporter, L-type),                              | 216092_s_at | -2.688880165 | 1.13037E-07 | 9.86E-07 Slc7a8    | -2.559691378 | 6.33995E-05 | 0.00520985 |
| HPGD      | hydroxyprostaglandin dehydrogenase 15-(NAD)                                            | 203914_x_at | -2.646579139 | 1.90555E-05 | 5.64E-05 Hpgd      | -1.10454782  | 0.007798116 | 0.04992863 |
| SORD      | sorbitol dehydrogenase                                                                 | 201562_s_at | -2.597415076 | 5.88235E-06 | 3.57E-05 Sord      | -2.899485981 | 0.00070392  | 0.01266473 |
| CYP4A11   | cytochrome P450, family 4, subfamily A, polypeptide 11                                 | 207407_x_at | -2.508655668 | 0.000139417 | 0.000255 Cyp4a10   | -3.113713092 | 0.001664018 | 0.0201257  |
| ALDH6A1   | Aldehyde dehydrogenase 6 family, member A1                                             | 221590_s_at | -2.452457617 | 4.61373E-06 | 3.63E-05 Aldh6a1   | -1.982446182 | 0.002939215 | 0.02771009 |
| ALDH4A1   | aldehyde dehydrogenase 4 family, member A1                                             | 211552_s_at | -2.451854091 | 3.55945E-06 | 3.03E-05 Aldh4a1   | -1.871531749 | 0.000617472 | 0.0119983  |
| ALDH6A1   | aldehyde dehydrogenase 6 family, member A1                                             | 221588_x_at | -2.43038225  | 1.31974E-07 | 2.71E-06 Aldh6a1   | -1.982446182 | 0.002939215 | 0.02771009 |
| MTPP      | microsomal triglyceride transfer protein                                               | 205675_at   | -2.381743055 | 2.07322E-06 | 2.14E-05 Mttp      | -1.787608103 | 0.007654339 | 0.04934436 |
| SLC5A2    | solute carrier family 5 (sodium/glucose cotransporter),                                | 207771_at   | -2.369914513 | 6.51085E-06 | 5.75E-05 Slc5a2    | -4.481132468 | 0.00096016  | 0.0148466  |
| HPGD      | hydroxyprostaglandin dehydrogenase 15-(NAD)                                            | 211548_s_at | -2.338315697 | 0.000170246 | 0.000333 Hpgd      | -1.10454782  | 0.007798116 | 0.04992863 |
| GLYAT     | glycine-N-acyltransferase                                                              | 206930_at   | -2.251862638 | 0.000115628 | 0.00027 Glyat      | -2.775284127 | 5.55084E-05 | 0.00504473 |
| ACOT11    | acyl-CoA thioesterase 11                                                               | 214763_at   | -2.235072924 | 2.08749E-08 | 7.65E-07 Acot11    | -1.484420453 | 0.002724147 | 0.02654531 |
| MYOM2     | myomesin (M-protein) 2, 165kDa                                                         | 205826_at   | -2.226808239 | 2.87241E-08 | 4.24E-07 Myom2     | -1.022969828 | 0.001887245 | 0.02148727 |
| ALDH6A1   | aldehyde dehydrogenase 6 family, member A1                                             | 221589_s_at | -2.197672077 | 6.42495E-08 | 3.76E-06 Aldh6a1   | -1.982446182 | 0.002939215 | 0.02771009 |
| PEPD      | peptidase D                                                                            | 202108_at   | -2.175452759 | 4.93677E-06 | 3.29E-05 Pepd      | -1.830872752 | 0.00081598  | 0.01353218 |
| ALDH6A1   | aldehyde dehydrogenase 6 family, member A1                                             | 204290_s_at | -2.164829783 | 0.000148148 | 0.000334 Aldh6a1   | -1.982446182 | 0.002939215 | 0.02771009 |
| ACOX2     | acyl-CoA oxidase 2, branched chain                                                     | 205364_at   | -2.157286716 | 4.24816E-07 | 5.23E-06 Acox2     | -3.323489082 | 0.000511292 | 0.01103198 |
| SLC22A7   | solute carrier family 22 (organic anion transporter), member                           | 220554_at   | -2.123265366 | 6.69618E-07 | 1.15E-05 Slc22a7   | -5.38965353  | 0.000136788 | 0.00663221 |
| PVALB     | parvalbumin                                                                            | 205336_at   | -2.071074968 | 1.77356E-05 | 0.000134 Pvalb     | -3.407752865 | 0.000102082 | 0.00597367 |
| SLC7A8    | solute carrier family 7 (amino acid transporter, L-type),                              | 202752_x_at | -2.061690129 | 8.66591E-07 | 7.42E-06 Slc7a8    | -2.559691378 | 6.33995E-05 | 0.00520985 |
| SLC5A12   | solute carrier family 5 (sodium/glucose cotransporter),                                | 214389_at   | -2.059312363 | 0.001985295 | 0.002203 Slc5a12   | -2.630201033 | 0.000505479 | 0.01096844 |
| IGFBP5    | insulin-like growth factor binding protein 5                                           | 203424_s_at | -2.016426495 | 0.001373013 | 0.00285 Igfbp5     | -2.01297437  | 0.000192901 | 0.0074173  |
| CLCNKB    | chloride channel Kb                                                                    | 205985_x_at | -1.986423828 | 1.48856E-05 | 0.000106 Clcnka    | -1.498197801 | 0.002695267 | 0.02639828 |
| NOX4      | NADPH oxidase 4                                                                        | 219773_at   | -1.985932929 | 1.00045E-05 | 4.27E-05 Nox4      | -1.836920876 | 1.4268E-05  | 0.00399921 |
| AMT       | aminomethyltransferase                                                                 | 204294_at   | -1.984117211 | 2.99369E-06 | 2.49E-05 Amt       | -1.110657963 | 0.001876592 | 0.02143619 |
| ABAT      | 4-aminobutyrate aminotransferase                                                       | 206527_at   | -1.972762668 | 1.67185E-09 | 1.47E-07 Abat      | -2.141716716 | 0.001326203 | 0.0177235  |
| CYP4A22   | cytochrome P450, family 4, subfamily A, polypeptide 22                                 | 217319_x_at | -1.959585017 | 0.000253232 | 0.000499 Cyp4a12a  | -5.927144395 | 0.000758456 | 0.01314909 |
| PC        | pyruvate carboxylase                                                                   | 204476_s_at | -1.951680563 | 1.60867E-05 | 7.49E-05 Pcx       | -2.936516419 | 0.000643936 | 0.01220115 |
| SFRP1     | secreted frizzled-related protein 1                                                    | 202035_s_at | -1.950635315 | 1.81174E-06 | 2.25E-05 Sfrp1     | -1.998849954 | 0.001719076 | 0.0204781  |
| GPD1      | glycerol-3-phosphate dehydrogenase 1 (soluble)                                         | 204997_at   | -1.945175954 | 3.02007E-05 | 0.00017 Gpd1       | -2.703401934 | 0.000195673 | 0.00747941 |
| DCXR      | dicarbonyl/L-xylulose reductase                                                        | 217973_at   | -1.92999478  | 0.000543646 | 0.001279 Dcxr      | -1.473091894 | 0.005709134 | 0.04113796 |
| PPP1R1A   | protein phosphatase 1, regulatory (inhibitor) subunit 1A                               | 205478_at   | -1.926097455 | 0.002032775 | 0.00296 Ppp1r1a    | -1.944112825 | 8.24168E-05 | 0.00550813 |
| KCNJ1     | potassium inwardly-rectifying channel, subfamily J, member 1                           | 210403_s_at | -1.920189654 | 8.67325E-05 | 0.000386 Kcnj1     | -1.012408513 | 0.004065203 | 0.03355651 |
| UPB1      | ureidopropionase, beta                                                                 | 220507_s_at | -1.919958983 | 0.001119121 | 0.001647 Upb1      | -3.146214492 | 0.000319018 | 0.00907159 |
| SLC25A10  | solute carrier family 25 (mitochondrial carrier; dicarboxylate transporter), member 10 | 218275_at   | -1.896727107 | 3.93002E-06 | 2.91E-05 Slc25a10  | -2.494497366 | 5.53936E-06 | 0.00377545 |
| FMO5      | flavin containing monooxygenase 5                                                      | 205776_at   | -1.89634525  | 0.000633072 | 0.001136 Fmo5      | -2.082342555 | 0.003104012 | 0.028708   |

|          |                                                              |             |              |             |          |          |              |             |            |
|----------|--------------------------------------------------------------|-------------|--------------|-------------|----------|----------|--------------|-------------|------------|
| SOSTDC1  | sclerostin domain containing 1                               | 213456_at   | -1.886628644 | 0.002071986 | 0.003314 | Sostdc1  | -1.559017285 | 0.000178036 | 0.00715825 |
| DHRS1    | dehydrogenase/reductase (SDR family) member 1                | 213279_at   | -1.873816782 | 5.29913E-07 | 7.48E-06 | Dhrs1    | -1.182946361 | 0.00140414  | 0.01832742 |
| HGD      | homogentisate 1,2-dioxygenase                                | 214307_at   | -1.852508581 | 1.1107E-06  | 1.56E-05 | Hgd      | -4.511245368 | 0.000551881 | 0.01140818 |
| ALDH8A1  | aldehyde dehydrogenase 8 family, member A1                   | 220148_at   | -1.844164291 | 0.004232756 | 0.003887 | Aldh8a1  | -3.11470589  | 0.001226715 | 0.01705625 |
| BDH1     | 3-hydroxybutyrate dehydrogenase, type 1                      | 211715_s_at | -1.844019384 | 3.06204E-07 | 6.22E-06 | Bdh1     | -1.411641265 | 0.001098585 | 0.01600453 |
| EGF      | epidermal growth factor                                      | 206254_at   | -1.842241373 | 0.002390176 | 0.004549 | Egf      | -5.882192793 | 1.39404E-05 | 0.00399921 |
| KCNJ15   | potassium inwardly-rectifying channel, subfamily J, member   | 210119_at   | -1.819943033 | 3.30414E-05 | 0.0008   | Kcnj15   | -2.008560667 | 0.004146306 | 0.03386576 |
| ENTPD5   | ectonucleoside triphosphate diphosphohydrolase 5             | 205757_at   | -1.796919366 | 4.444E-07   | 5.86E-06 | Entpd5   | -2.104759878 | 0.001000389 | 0.01520399 |
| SLC17A1  | solute carrier family 17 (sodium phosphate), member 1        | 206872_at   | -1.785722299 | 0.004117746 | 0.005322 | Slc17a1  | -3.113719826 | 0.000112638 | 0.00617555 |
| HADH     | hydroxyacyl-CoA dehydrogenase                                | 201036_s_at | -1.784130475 | 1.68508E-08 | 4.11E-07 | Hadh     | -1.754518619 | 8.6021E-05  | 0.00562239 |
| IVD      | isovaleryl-CoA dehydrogenase                                 | 216958_s_at | -1.774471608 | 9.18733E-07 | 1.32E-05 | Ivd      | -1.70380368  | 0.00038394  | 0.00979519 |
| PTGER3   | prostaglandin E receptor 3 (subtype EP3)                     | 210375_at   | -1.769011176 | 0.00145229  | 0.002086 | Ptger3   | -2.309612315 | 0.000973167 | 0.01498773 |
| SULT1C2  | sulfotransferase family, cytosolic, 1C, member 2             | 211470_s_at | -1.754939097 | 0.00024948  | 0.000412 | Sult1c2  | -2.5396222   | 0.000774335 | 0.01326978 |
| SELENBP1 | selenium binding protein 1                                   | 214433_s_at | -1.743712894 | 3.48784E-06 | 3.65E-05 | Selenbp1 | -2.463021452 | 0.001099907 | 0.01601037 |
| SLC22A7  | solute carrier family 22 (organic anion transporter), member | 212662_s_at | -1.730918862 | 0.000143966 | 0.000498 | Slc22a7  | -5.38965353  | 0.000136788 | 0.00663221 |
| PPP1R16B | protein phosphatase 1, regulatory (inhibitor) subunit 16B    | 41577_at    | -1.7234205   | 0.000484942 | 0.00117  | Ppp1r16b | -1.850744883 | 0.000779457 | 0.01329374 |
| QDPR     | quinoid dihydropteridine reductase                           | 209123_at   | -1.716109811 | 3.73123E-07 | 4.66E-06 | Qdpr     | -1.708300911 | 0.000465627 | 0.01057855 |
| SUOX     | sulfite oxidase                                              | 204067_at   | -1.699400538 | 2.1762E-06  | 2.06E-05 | Suox     | -2.503000307 | 6.32595E-06 | 0.00381621 |
| CASR     | calcium-sensing receptor                                     | 210577_at   | -1.682483493 | 5.87292E-06 | 5.09E-05 | Casr     | -2.184904289 | 2.49048E-05 | 0.00426538 |
| PCCA     | propionyl CoA carboxylase, alpha polypeptide                 | 203860_at   | -1.673003462 | 4.41215E-05 | 0.000156 | Pcca     | -1.578279345 | 7.20455E-05 | 0.00537404 |
| ALDH4A1  | aldehyde dehydrogenase 4 family, member A1                   | 203722_at   | -1.671807451 | 0.002274422 | 0.003798 | Aldh4a1  | -1.871531749 | 0.000617472 | 0.0119983  |
| PDE1A    | phosphodiesterase 1A, calmodulin-dependent                   | 208396_s_at | -1.652569943 | 0.000356871 | 0.000767 | Pde1a    | -1.678909423 | 0.001611346 | 0.01974978 |
| PPP1R16B | protein phosphatase 1, regulatory (inhibitor) subunit 16B    | 212750_at   | -1.646410415 | 0.000137171 | 0.00045  | Ppp1r16b | -1.850744883 | 0.000779457 | 0.01329374 |
| GNPDA1   | glucosamine-6-phosphate deaminase 1                          | 202382_s_at | -1.642565179 | 3.53315E-07 | 4.50E-06 | Gnpda1   | -1.352053267 | 7.51125E-05 | 0.00540239 |
| FMO1     | flavin containing monooxygenase 1                            | 205666_at   | -1.619178525 | 0.001344098 | 0.004401 | Fmo1     | -1.807041559 | 0.002456246 | 0.02495115 |
| APOM     | apolipoprotein M                                             | 205682_x_at | -1.617419412 | 0.001451753 | 0.00198  | Apom     | -3.129770901 | 0.000126897 | 0.00648825 |
| USP2     | ubiquitin specific peptidase 2                               | 207213_s_at | -1.617366422 | 0.000100937 | 0.000407 | Usp2     | -1.567347068 | 0.002753083 | 0.02669377 |
| ADH1C    | alcohol dehydrogenase 1C (class I), gamma polypeptide        | 206262_at   | -1.615864839 | 0.00034841  | 0.001093 | Adh1     | -1.648838987 | 0.003268909 | 0.02952758 |
| HAGH     | hydroxyacylglutathione hydrolase                             | 205012_s_at | -1.601916745 | 2.09156E-05 | 0.000129 | Hagh     | -1.09956772  | 0.000358541 | 0.00940595 |
| AHCYL2   | adenosylhomocysteinase-like 2                                | 212814_at   | -1.601455095 | 4.85407E-05 | 0.000174 | Ahcyl2   | -1.963618538 | 7.22751E-05 | 0.00537962 |
| MACROD1  | MACRO domain containing 1                                    | 219188_s_at | -1.594356096 | 1.10204E-05 | 9.42E-05 | MacroD1  | -1.05934651  | 0.001385646 | 0.01826509 |
| APOM     | apolipoprotein M                                             | 214910_s_at | -1.580705081 | 0.003096197 | 0.003773 | Apom     | -3.129770901 | 0.000126897 | 0.00648825 |
| ATP6V1B1 | ATPase, H+ transporting, lysosomal 56/58kDa, V1 subunit B1   | 205473_at   | -1.574423393 | 5.22045E-07 | 9.73E-06 | Atp6v1b1 | -1.388477997 | 0.004873641 | 0.03742991 |
| HMGCL    | 3-hydroxymethyl-3-methylglutaryl-CoA lyase                   | 202772_at   | -1.569200852 | 3.31223E-05 | 0.000149 | Hmgcl    | -1.548500143 | 0.000304176 | 0.00886913 |
| LRRC19   | leucine rich repeat containing 19                            | 220376_at   | -1.549372596 | 0.00629781  | 0.006738 | Lrrc19   | -2.515620887 | 0.003100222 | 0.02869873 |
| PCCB     | propionyl CoA carboxylase, beta polypeptide                  | 212694_s_at | -1.541722171 | 0.000260767 | 0.000935 | Pccb     | -1.138025351 | 0.001211491 | 0.01695455 |
| CYP4A11  | cytochrome P450, family 4, subfamily A, polypeptide 11       | 211231_x_at | -1.536796967 | 2.14008E-09 | 1.72E-07 | Cyp4a10  | -3.113713092 | 0.001664018 | 0.0201257  |
| ARL4D    | ADP-ribosylation factor-like 4D                              | 203586_s_at | -1.535481283 | 3.45549E-09 | 2.28E-07 | Arl4d    | -1.068820283 | 0.001864335 | 0.02135059 |
| PKLR     | pyruvate kinase, liver and RBC                               | 222078_at   | -1.524988011 | 0.000807859 | 0.001259 | Pklr     | -1.148267141 | 0.001215269 | 0.01697177 |
| APOO     | apolipoprotein O                                             | 221620_s_at | -1.511444298 | 8.7945E-06  | 6.18E-05 | Apoo     | -1.796602391 | 0.001304336 | 0.01758703 |
| FOLR1    | folate receptor 1 (adult)                                    | 204437_s_at | -1.498872039 | 0.0284102   | 0.030354 | Folr1    | -2.551735971 | 0.000662371 | 0.0123387  |
| HADH     | hydroxyacyl-CoA dehydrogenase                                | 211569_s_at | -1.493726017 | 0.00431899  | 0.006219 | Hadh     | -1.754518619 | 8.6021E-05  | 0.00562239 |
| FMO5     | flavin containing monooxygenase 5                            | 215300_s_at | -1.488247466 | 0.000433869 | 0.001247 | Fmo5     | -2.082342555 | 0.003104012 | 0.028708   |
| PTGER3   | prostaglandin E receptor 3 (subtype EP3)                     | 213933_at   | -1.485209873 | 0.003200292 | 0.004227 | Ptger3   | -2.309612315 | 0.000973167 | 0.01498773 |
| SORD     | sorbitol dehydrogenase                                       | 201563_at   | -1.485082722 | 0.001086867 | 0.002115 | Sord     | -2.899485981 | 0.00070392  | 0.01266473 |
| SLC46A3  | solute carrier family 46, member 3                           | 214719_at   | -1.484572779 | 0.000165096 | 0.000309 | Slc46a3  | -1.877036337 | 0.000335525 | 0.00918334 |
| PINK1    | PTEN induced putative kinase 1                               | 209019_s_at | -1.479868677 | 8.23598E-07 | 6.61E-06 | Pink1    | -1.103277295 | 0.006095131 | 0.04294016 |
| SLC22A13 | solute carrier family 22 (organic anion transporter), member | 207444_at   | -1.470823156 | 6.52715E-07 | 1.11E-05 | Slc22a13 | -2.566232578 | 9.56357E-05 | 0.00586611 |
| SLC26A4  | solute carrier family 26, member 4                           | 206529_x_at | -1.467914427 | 0.000459122 | 0.001182 | Slc26a4  | -3.376771807 | 4.76368E-06 | 0.0037192  |

|          |                                                                                                                   |             |              |             |                   |              |             |            |
|----------|-------------------------------------------------------------------------------------------------------------------|-------------|--------------|-------------|-------------------|--------------|-------------|------------|
| BTD      | biotinidase                                                                                                       | 204167_at   | -1.45890614  | 2.36203E-06 | 1.34E-05 Btd      | -1.522971298 | 2.14534E-05 | 0.0040153  |
| COL4A3   | collagen, type IV, alpha 3 (Goodpasture antigen)                                                                  | 222073_at   | -1.451153536 | 0.016006296 | 0.019942 Col4a3   | -1.469912699 | 0.000377879 | 0.00970095 |
| DNASE1   | deoxyribonuclease I                                                                                               | 210165_at   | -1.417964146 | 0.00058768  | 0.00178 Dnase1    | -4.671175586 | 1.6512E-05  | 0.00399921 |
| CYP24A1  | cytochrome P450, family 24, subfamily A, polypeptide 1                                                            | 206504_at   | -1.414010992 | 0.008265023 | 0.013007 Cyp24a1  | -1.510049363 | 0.007120465 | 0.04723016 |
| AQP3     | aquaporin 3 (Gill blood group)                                                                                    | 39248_at    | -1.399608907 | 0.001659832 | 0.001901 Aqp3     | -2.517495519 | 0.001668169 | 0.02015487 |
| ODC1     | ornithine decarboxylase 1                                                                                         | 200790_at   | -1.398713305 | 0.000515497 | 0.001323 Odc1     | -2.602420378 | 0.000168874 | 0.00704225 |
| TREH     | trehalase (brush-border membrane glycoprotein)                                                                    | 207378_at   | -1.397424582 | 0.00026027  | 0.000614 Treh     | -3.247663186 | 3.99535E-05 | 0.00484593 |
| PIK3C2G  | phosphoinositide-3-kinase, class 2, gamma polypeptide                                                             | 215129_at   | -1.39375725  | 1.88293E-05 | 0.000133 Pik3c2g  | -3.418040021 | 1.00463E-05 | 0.00399921 |
| TBC1D13  | TBC1 domain family, member 13                                                                                     | 218596_at   | -1.391369094 | 4.36453E-07 | 5.07E-06 Tbc1d13  | -1.258200184 | 0.000196285 | 0.00747941 |
| KMO      | kynurenine 3-monooxygenase (kynurenine 3-hydroxylase)                                                             | 205307_s_at | -1.386286333 | 0.00367475  | 0.00493 Kmo       | -2.715927539 | 0.0041161   | 0.03379207 |
| AQP7     | aquaporin 7                                                                                                       | 206955_at   | -1.363651    | 4.01309E-07 | 5.94E-06 Aqp7     | -1.371670339 | 0.000307009 | 0.00890683 |
| ACADSB   | acyl-CoA dehydrogenase, short/branched chain membrane associated guanylate kinase, WW and PDZ domain containing 2 | 205355_at   | -1.36103382  | 0.000325589 | 0.000696 Acadsb   | -1.375378643 | 0.001192572 | 0.01680943 |
| MAGI2    | 3-hydroxyisobutyryl-CoA hydrolase                                                                                 | 209737_at   | -1.359881807 | 0.010555344 | 0.015948 Magi2    | -1.291076419 | 0.000576431 | 0.01160877 |
| HIBCH    | TBC1 domain family, member 13                                                                                     | 213374_x_at | -1.357921262 | 0.000125807 | 0.000405 Hibch    | -1.714143897 | 0.00038465  | 0.00979519 |
| TBC1D13  | N-acetyltransferase 8B (GCN5-related, putative,                                                                   | 44696_at    | -1.299975324 | 2.32073E-06 | 1.42E-05 Tbc1d13  | -1.258200184 | 0.000196285 | 0.00747941 |
| NAT8B    | aquaporin 6, kidney specific                                                                                      | 206964_at   | -1.280371919 | 0.013948512 | 0.013619 Cml1     | -4.881253657 | 2.03494E-06 | 0.0037192  |
| AQP6     | solute carrier family 2 (facilitated glucose transporter),                                                        | 216219_at   | -1.279410557 | 5.698E-05   | 0.000224 Aqp6     | -2.275537265 | 0.001733419 | 0.02055372 |
| SLC2A2   | PDZ domain containing 3                                                                                           | 206535_at   | -1.278439676 | 0.014363411 | 0.013487 Slc2a2   | -3.262860473 | 3.04666E-05 | 0.00448409 |
| PDZD3    | Dnaj (Hsp40) homolog, subfamily C, member 6                                                                       | 220303_at   | -1.272795376 | 4.6708E-06  | 2.52E-05 Pdzd3    | -2.043494721 | 0.002138392 | 0.02307684 |
| DNAJC6   | serum/glucocorticoid regulated kinase 2                                                                           | 204720_s_at | -1.26470978  | 0.001280433 | 0.016236 Dnajc6   | -1.970810033 | 0.000828564 | 0.01364324 |
| SGK2     | UDP glucuronosyltransferase 2 family, polypeptide B28                                                             | 220357_s_at | -1.257151492 | 8.20754E-06 | 5.02E-05 Sgk2     | -3.144518601 | 3.77257E-05 | 0.00478125 |
| UGT2B28  | phytanoyl-CoA 2-hydroxylase                                                                                       | 211682_x_at | -1.253569549 | 0.000458596 | 0.005564 Ugt2b37  | -5.804949298 | 6.96329E-05 | 0.00537274 |
| PHYH     | emopamil binding protein (sterol isomerase)                                                                       | 203335_at   | -1.251983761 | 4.15818E-05 | 0.000154 Phyh     | -2.321044983 | 0.000258218 | 0.00834168 |
| EBP      | claudin 10                                                                                                        | 202735_at   | -1.248341327 | 1.88252E-06 | 2.54E-05 Ebp      | -1.667550145 | 9.66442E-05 | 0.00588053 |
| CLDN10   | chromosome 21 open reading frame 33                                                                               | 205328_at   | -1.242757043 | 0.007108696 | 0.008036 Cldn10   | -1.559497136 | 0.000229642 | 0.00794339 |
| C21orf33 | aconitase 2, mitochondrial                                                                                        | 202217_at   | -1.241093341 | 0.000159099 | 0.000484 D10Jhu81 | -1.249032992 | 0.000637102 | 0.01212133 |
| ACO2     | pyroglutamyl-peptidase I                                                                                          | 200793_s_at | -1.233882984 | 0.012386773 | 0.016372 Aco2     | -1.098117997 | 0.000134722 | 0.00660499 |
| PGPEP1   | solute carrier family 12 (potassium/chloride transporters),                                                       | 219891_at   | -1.211257358 | 0.000206447 | 0.000424 Pgpep1   | -1.236920716 | 0.002344674 | 0.02433588 |
| SLC12A6  | UDP-N-acetyl-alpha-D-galactosamine:polypeptide N-acetylgalactosaminyltransferase 11 (GalNAc-T11)                  | 220740_s_at | -1.189946827 | 4.86563E-05 | 0.000209 Slc12a6  | -1.466748455 | 0.001812725 | 0.02103908 |
| GALNT11  | phosphate cytidyltransferase 2, ethanolamine                                                                      | 219013_at   | -1.187466061 | 0.000147103 | 0.000352 Galnt11  | -3.504490232 | 2.12609E-05 | 0.0040153  |
| PCYT2    | acyl-CoA dehydrogenase family, member 10                                                                          | 209577_at   | -1.179916808 | 4.81557E-05 | 0.000273 Pcyt2    | -1.269096513 | 9.76142E-05 | 0.00588053 |
| ACAD10   | N-acylaminoacyl-peptide hydrolase                                                                                 | 219986_s_at | -1.179189227 | 1.46259E-06 | 1.35E-05 Acad10   | -1.922867795 | 7.91865E-05 | 0.00545212 |
| APEH     | ubiquinol-cytochrome c reductase core protein I                                                                   | 201284_s_at | -1.175206544 | 0.006183912 | 0.015073 Apeh     | -1.897000253 | 1.5312E-05  | 0.00399921 |
| UQCRC1   | solute carrier family 12 (sodium/chloride transporters),                                                          | 201903_at   | -1.171188707 | 0.00206817  | 0.004994 Uqcrc1   | -1.123251981 | 6.47745E-06 | 0.00381621 |
| SLC12A3  | homogentisate 1,2-dioxygenase                                                                                     | 208354_s_at | -1.163375126 | 6.70235E-05 | 0.000334 Slc12a3  | -2.378798902 | 0.000804958 | 0.01346632 |
| HGD      | glyoxylate reductase/hydroxypyruvate reductase                                                                    | 214308_s_at | -1.146382972 | 0.019406774 | 0.033105 Hgd      | -4.511245368 | 0.000551881 | 0.01140818 |
| GRHPR    | chloride channel 5                                                                                                | 214864_s_at | -1.135399114 | 0.000350799 | 0.000926 Grhpr    | -1.872401341 | 0.000323686 | 0.00910302 |
| CLCN5    | phospholipase C, beta 1 (phosphoinositide-specific)                                                               | 206704_at   | -1.129812392 | 0.000599926 | 0.000934 Clcn5    | -1.638146087 | 0.000283037 | 0.00870652 |
| PLCB1    | aldehyde dehydrogenase 3 family, member A2                                                                        | 215687_x_at | -1.126499614 | 7.14989E-05 | 0.00032 Plcb1     | -2.110467204 | 6.08883E-05 | 0.00517476 |
| ALDH3A2  | solute carrier family 22 (organic anion transporter), member                                                      | 202053_s_at | -1.124159636 | 0.000618054 | 0.001114 Aldh3a2  | -1.473562728 | 0.000336105 | 0.00919199 |
| SLC22A7  | ketohexokinase (fructokinase)                                                                                     | 221661_at   | -1.109317052 | 0.000714748 | 0.002096 Slc22a7  | -5.38965353  | 0.000136788 | 0.00663221 |
| KHK      | aconitase 1, soluble                                                                                              | 205175_s_at | -1.106343156 | 0.003042404 | 0.003613 Khk      | -3.177435931 | 0.000180415 | 0.00720005 |
| ACO1     | transmembrane and coiled-coil domains 3                                                                           | 207071_s_at | -1.105675481 | 0.0001015   | 0.000351 Aco1     | -1.336825778 | 0.00064611  | 0.01221468 |
| TMCO3    | ATPase, H+ transporting, lysosomal 34kDa, V1 subunit D                                                            | 220240_s_at | -1.105274885 | 0.000233427 | 0.000735 Tmco3    | -1.866187262 | 0.000157579 | 0.00689852 |
| ATP6V1D  | ATP5S-like                                                                                                        | 214923_at   | -1.104436955 | 4.82756E-06 | 3.88E-05 Atp6v1d  | -1.301714937 | 0.000510373 | 0.01103198 |
| ATP5SL   | pyridoxamine 5'-phosphate oxidase                                                                                 | 218038_at   | -1.098833237 | 1.41707E-07 | 2.58E-06 Atp5sl   | -1.04949825  | 7.8639E-05  | 0.00545212 |
| PNPO     |                                                                                                                   | 218511_s_at | -1.097552485 | 2.38864E-05 | 0.000161 Pnpo     | -1.549224149 | 0.000291813 | 0.00878845 |

|          |                                                                            |             |              |             |          |          |              |             |            |
|----------|----------------------------------------------------------------------------|-------------|--------------|-------------|----------|----------|--------------|-------------|------------|
| FAM107A  | family with sequence similarity 107, member A                              | 207547_s_at | -1.088629413 | 1.4514E-08  | 1.15E-06 | Fam107a  | -2.210317407 | 0.000744377 | 0.01302585 |
| ENPP1    | ectonucleotide pyrophosphatase/phosphodiesterase 1                         | 205066_s_at | -1.088224603 | 0.004271147 | 0.005833 | Enpp1    | -1.522179212 | 0.004123354 | 0.0338235  |
| MLX      | MAX-like protein X                                                         | 217910_x_at | -1.08439792  | 4.35034E-10 | 5.38E-08 | Mlx      | -1.121140758 | 0.001336694 | 0.01780558 |
| MGAT3    | mannosyl (beta-1,4-)-glycoprotein beta-1,4-N-acetylglucosaminyltransferase | 208058_s_at | -1.081878236 | 2.05865E-06 | 2.28E-05 | Mgat3    | -1.448695556 | 0.003976683 | 0.03312473 |
| CRAT     | carnitine O-acetyltransferase                                              | 205843_x_at | -1.080696101 | 2.40255E-06 | 1.92E-05 | Crat     | -1.078575154 | 0.000805107 | 0.01346632 |
| PKLR     | pyruvate kinase, liver and RBC                                             | 210451_at   | -1.078660794 | 0.000354206 | 0.000672 | Pklr     | -1.148267141 | 0.001215269 | 0.01697177 |
| AASS     | aminoadipate-semialdehyde synthase                                         | 210852_s_at | -1.072318729 | 5.19899E-07 | 4.71E-06 | Aass     | -1.788865625 | 0.006348041 | 0.04401714 |
| IVD      | isovaleryl-CoA dehydrogenase                                               | 203682_s_at | -1.054924276 | 0.000848728 | 0.001895 | Ivd      | -1.70380368  | 0.00038394  | 0.00979519 |
| GRHPR    | glyoxylate reductase/hydroxypyruvate reductase                             | 216308_x_at | -1.037453227 | 0.003332299 | 0.00606  | Grhpr    | -1.872401341 | 0.000323686 | 0.00910302 |
| LRPAP1   | low density lipoprotein receptor-related protein associated                | 201186_at   | -1.036533295 | 2.18356E-05 | 0.00023  | Lrpap1   | -1.768365403 | 0.00010744  | 0.0060728  |
| SLC22A18 | solute carrier family 22, member 18                                        | 204981_at   | -1.032945824 | 0.008732394 | 0.019058 | Slc22a18 | -2.495895935 | 0.00044834  | 0.01040497 |
| ALDH3A2  | aldehyde dehydrogenase 3 family, member A2                                 | 202054_s_at | -1.032452069 | 0.00267155  | 0.003308 | Aldh3a2  | -1.473562728 | 0.000336105 | 0.00919199 |
| FH       | fumarate hydratase                                                         | 214170_x_at | -1.030190241 | 1.20059E-06 | 1.26E-05 | Fh1      | -1.273506143 | 2.1489E-05  | 0.0040153  |
| GRHPR    | glyoxylate reductase/hydroxypyruvate reductase                             | 201347_x_at | -1.019540397 | 0.005102723 | 0.008647 | Grhpr    | -1.872401341 | 0.000323686 | 0.00910302 |
| DAPK2    | death-associated protein kinase 2                                          | 206324_s_at | -1.017683748 | 3.58285E-06 | 3.92E-05 | Dapk2    | -1.213032438 | 0.000569319 | 0.01155113 |
| GATM     | glycine amidinotransferase (L-arginine:glycine                             | 216733_s_at | -1.011210348 | 0.026266913 | 0.028375 | Gatm     | -4.01088539  | 0.00017515  | 0.00714491 |
| ITIH2    | inter-alpha (globulin) inhibitor H2                                        | 204987_at   | -1.009697141 | 1.39668E-06 | 2.02E-05 | Itih2    | -2.024938428 | 0.000611129 | 0.01194089 |
| ABHD14A  | abhydrolase domain containing 14A                                          | 210006_at   | -1.007922499 | 0.005118241 | 0.00943  | Abhd14a  | -1.671688267 | 0.000543374 | 0.01133035 |
| CASR     | calcium-sensing receptor                                                   | 211384_s_at | -1.006016981 | 3.40553E-07 | 6.43E-06 | Casr     | -2.184904289 | 2.49048E-05 | 0.00426538 |
| ALDH7A1  | aldehyde dehydrogenase 7 family, member A1                                 | 208950_s_at | -1.002408048 | 0.001848593 | 0.002726 | Aldh7a1  | -2.689588996 | 4.78502E-05 | 0.00494666 |
| MAGI2    | membrane associated guanylate kinase, WW and PDZ domain containing 2       | 207702_s_at | -1.00014011  | 0.015209202 | 0.02013  | Magi2    | -1.291076419 | 0.000576431 | 0.01160877 |
